# Supplementary material for: Dual RNA Sequencing Reveals the Genome-Wide Expression Profiles During the Compatible and Incompatible Interactions Between Solanum tuberosum and Phytophthora infestans
Source: Front Plant Sci. 2022 Mar 3;13:817199. doi: 10.3389/fpls.2022.817199 (PMC8993506; doi:10.3389/fpls.2022.817199)
Supplement: Supplementary file 7 [file Table_4.XLSX]

## Sheet: Sheet1
Table S4 The 378 up-regulated genes during the incompatible interaction process
#GeneID	Length	Putative_function	R1-Count	R1-Normalized	R1-FPKM	R2-Count	R2-Normalized	R2-FPKM	R3-Count	R3-Normalized	R3-FPKM	S1-Count	S1-Normalized	S1-FPKM	S2-Count	S2-Normalized	S2-FPKM	S3-Count	S3-Normalized	S3-FPKM	Pfam	Panther	KOG	EC	KO	GO	Best-hit-arabi-name	arabi-symbol	arabi-defline
PGSC0003DMG400000030	4704	Hypothetical protein	942	1167.33	17.282	2587	2618.5	37.672	3099	2647.06	38.164	1237	1567.15	23.171	5303	4304.32	65.021	4553	4141.2	62.069		PTHR33191,PTHR33191:SF4
PGSC0003DMG400000073	1486	Class III chitinase	3	3.718	0.153	29	29.353	1.298	77	64.938	2.737	1	0.997	0.041	6	4.525	0.19	75	67.35	2.837	PF00704	PTHR11177,PTHR11177:SF158		3.2.1.14	K01183	GO:0005975,GO:0004553	AT5G24090.1	ATCHIA,CHIA	chitinase A
PGSC0003DMG400000079	4195	BCL-2-associated athanogene 6	1830	2267.74	30.107	5215	5278.5	70.031	12300	10506.2	138.752	4313	5464.12	72.353	17548	14243.3	187.759	11539	10497.7	139.496	PF02179	PTHR33322,PTHR33322:SF4				GO:0051087	AT2G46240.1	ATBAG6,BAG6	BCL-2-associated athanogene 6
PGSC0003DMG400000084	2659	SKIP interacting protein 7	122	149.943	5.55	361	365.394	9.947	389	331.417	12.459	139	176.098	8.964	262	211.847	10.354	295	267.468	9.245		PTHR31071,PTHR31071:SF4					AT5G41620.1
PGSC0003DMG400000129	991	SAUR family protein	79	97.897	6.56	246	248.995	16.626	330	281.875	18.397	77	97.551	6.451	312	253.243	16.38	102	92.795	6.246	PF02519	PTHR31374,PTHR31374:SF29				GO:0009733	AT2G46690.1		SAUR-like auxin-responsive protein family
PGSC0003DMG400000184	2558	Ferric-chelate reductase	273	337.063	8.133	1553	1570.9	37.95	2421	2067.93	49.456	423	535.897	12.957	3671	2978.85	71.159	5419	4929.05	119.545	PF01794,PF08022,PF08030	PTHR11972,PTHR11972:SF41		1.16.1.7		GO:0055114,GO:0016491	AT1G01580.1	ATFRO2,FRD1,FRO2	ferric reduction oxidase 2
PGSC0003DMG400000243	1563	ATP binding protein	1	0.004	0	34	34.155	1.326	42	35.161	1.347	15	18.747	0.724	1	0.503	0.019	17	14.617	0.57	PF14363,PF00004	PTHR23070,PTHR23070:SF13	KOG0743		K08900	GO:0005524	AT2G46620.1		P-loop containing nucleoside triphosphate hydrolases superfamily protein
PGSC0003DMG400000315	488	Hypothetical protein	111	137.551	25.277	431	436.248	79.399	545	465.521	79.719	142	179.899	31.894	1447	1174.5	196.437	248	225.619	41.985		PTHR33132					AT5G55980.1		serine-rich protein-related
PGSC0003DMG400000393	1666	Hypothetical protein	227	281.299	13.051	754	762.169	36.24	831	708.958	32.811	208	263.514	12.475	1399	1134.72	52.333	958	871.545	41.803	PF07651	PTHR12276,PTHR12276:SF10	KOG2056			GO:0005543	AT3G46540.1		ENTH/VHS family protein
PGSC0003DMG400000396	2576	Spotted leaf protein	209	258.994	5.892	724	731.804	16.628	693	591.937	13.342	252	317.991	7.206	974	790.573	17.762	666	605.897	13.802	PF04564,PF00514	PTHR23315,PTHR23315:SF69		6.3.2.19		GO:0016567,GO:0004842,GO:0005515	AT3G46510.1	ATPUB13,PUB13	plant U-box 13
PGSC0003DMG400000444	2319	Heat shock cognate 70 kDa protein	60	73.113	1.918	285	288.47	7.554	724	617.562	16.026	103	130.49	3.345	554	449.669	11.561	955	867.906	22.671	PF00012	PTHR19375,PTHR19375:SF218			K03283		AT5G02500.1	AT-HSC70-1,HSC70,HSC70-1,HSP70-1	heat shock cognate protein 70-1
PGSC0003DMG400000498	1435	Homeodomain leucine zipper protein	703	869.92	40.696	1780	1801.67	86.517	2254	1925.29	100.25	514	651.184	30.124	2279	1849.81	84.305	1526	1387.37	60.628	PF00046,PF02183	PTHR24326,PTHR24326:SF136	KOG0483		K09338	GO:0003677,GO:0043565,GO:0006355,GO:0003700	AT3G01470.1	ATHB-1,ATHB1,HAT5,HB-1,HD-ZIP-1	homeobox 1
PGSC0003DMG400000717	1003	Hypothetical protein	29	35.937	2.372	239	241.91	15.912	261	222.937	14.339	16	20.27	1.321	142	115.258	7.347	70	63.683	4.222		PTHR33640,PTHR33640:SF3					AT5G66440.1
PGSC0003DMG400000718	1105	Hypothetical protein	94	116.485	6.823	276	279.361	16.313	351	299.812	17.161	64	81.081	4.695	406	329.541	18.713	164	149.2	8.774		PTHR33640,PTHR33640:SF3					AT5G66440.1
PGSC0003DMG400000731	919	Response to dessication RD2	30	37.176	2.74	154	155.875	11.445	941	803.771	57.559	63	79.814	5.798	507	411.52	29.178	2135	1942.33	143.892	PF00582	PTHR31964,PTHR31964:SF26				GO:0006950	AT2G21620.1	RD2	Adenine nucleotide alpha hydrolases-like superfamily protein
PGSC0003DMG400000798	1859	Cytochrome P450	18	22.306	0.713	108	108.309	3.501	86	72.604	2.309	46	58.277	1.894	63	51.136	1.618	74	66.417	2.138	PF00067	PTHR24286,PTHR24286:SF71	KOG0157	1.14.13.93		GO:0055114,GO:0020037,GO:0016705,GO:0005506	AT1G19630.1	CYP722A1	cytochrome P450, family 722, subfamily A, polypeptide 1
PGSC0003DMG400000919	1377	Nodulin family protein	467	578.707	26.068	1375	1391.74	62.542	1714	1464.04	64.786	515	652.451	29.333	2466	2001.59	88.031	779	708.699	32.021	PF00892	PTHR31218,PTHR31218:SF12				GO:0016021,GO:0016020,GO:0022857	AT4G08300.1		nodulin MtN21 /EamA-like transporter family protein
PGSC0003DMG400001060	2088	Brassinosteroid hydroxylase	31	38.415	1.216	228	229.764	7.008	283	240.875	7.353	32	40.541	1.132	193	155.842	4.546	256	232.897	6.849	PF00067	PTHR24282,PTHR24282:SF25	KOG0157		K15639	GO:0055114,GO:0020037,GO:0016705,GO:0005506	AT2G26710.1	BAS1,CYP72B1,CYP734A1	Cytochrome P450 superfamily protein
PGSC0003DMG400001161	2206	MYC transcription factor	150	185.88	4.914	451	456.491	12.051	540	461.25	12.067	165	209.038	5.497	619	502.428	13.096	825	750.548	19.877	PF00010,PF14215	PTHR11514,PTHR11514:SF43			K13422	GO:0046983	AT1G32640.1	ATMYC2,JAI1,JIN1,MYC2,RD22BP1,ZBF1	Basic helix-loop-helix (bHLH) DNA-binding family protein
PGSC0003DMG400001333	938	Calcium ion binding protein	11	13.631	0.979	66	66.804	4.779	680	580.833	40.554	77	97.551	6.907	189	153.407	10.608	1335	1214.52	87.649	PF13499	PTHR10891,PTHR10891:SF574	KOG0027		K02183		AT5G39670.1		Calcium-binding EF-hand family protein
PGSC0003DMG400001393	2168	Amino acid permease	180	221.817	6.453	878	887.679	25.956	1088	929.334	26.676	215	271.116	7.902	1578	1280.02	36.894	271	245.634	7.241	PF07690	PTHR11654,PTHR11654:SF82	KOG1237		K14638	GO:0055085,GO:0016021,GO:0016020,GO:0006810,GO:0005215	AT5G14940.1		Major facilitator superfamily protein
PGSC0003DMG400001508	1302	Ammonium transporter 1 member 1	618	765.827	36.843	1728	1749.04	83.931	3054	2608.62	123.14	969	1227.62	58.5	4601	3734.52	175.135	5032	4577.89	220.957	PF00909	PTHR11730,PTHR11730:SF39			K03320	GO:0016020,GO:0015696,GO:0008519,GO:0072488	AT4G13510.1	AMT1;1,ATAMT1,ATAMT1;1	ammonium transporter 1;1
PGSC0003DMG400001579	1289	Hypothetical protein	411	508.072	24.748	2142	2167.07	105.516	2586	2208.88	105.632	506	641.05	30.92	3859	3131.45	148.721	1329	1208.15	59.052	PF13716	PTHR11106,PTHR11106:SF58					AT4G35750.1		SEC14 cytosolic factor family protein / phosphoglyceride transfer family protein
PGSC0003DMG400001598	719	Snakin-2	94	116.485	11.891	354	358.31	36.381	452	386.083	37.873	134	169.764	16.985	3208	2603.86	251.981	601	546.763	56.203	PF02704	PTHR23201,PTHR23201:SF2					AT1G75750.2	GASA1	GAST1 protein homolog 1
PGSC0003DMG400001671	2231	Peptide transporter	34	42.133	1.284	146	147.778	3.853	160	136.667	3.532	15	19.003	0.494	29	23.539	0.677	16	14.556	0.381	PF00854	PTHR11654,PTHR11654:SF90			K14638	GO:0016020,GO:0006810,GO:0005215	AT1G32450.1	NRT1.5	nitrate transporter 1.5
PGSC0003DMG400001735	2566	Pentatricopeptide repeat-containing protein, chloroplastic	613	759.631	17.027	2044	2068.89	46.319	1972	1684.42	37.422	679	860.222	19.196	2904	2357.11	52.205	1033	939.777	21.097	PF13812,PF01535,PF13041	PTHR24015,PTHR24015:SF901					AT3G09650.1	CRM3,HCF152	Tetratricopeptide repeat (TPR)-like superfamily protein
PGSC0003DMG400001774	1395	Peroxidase	21	26.023	1.377	96	97.169	5.018	174	148.625	7.657	31	38.007	1.935	459	372.559	18.224	406	369.361	18.545	PF00141	PTHR31235,PTHR31235:SF11		1.11.1.7	K00430	GO:0055114,GO:0020037,GO:0006979,GO:0004601	AT2G37130.1		Peroxidase superfamily protein
PGSC0003DMG400001775	4558	Protein containing C-terminal RING-finger	541	670.23	14.446	1531	1548.83	29.334	1768	1510.14	29.379	638	808.047	19.74	3480	2824.43	50.919	2316	2106.53	40.746	PF13639	PTHR22937,PTHR22937:SF47				GO:0008270,GO:0005515	AT2G37150.3		RING/U-box superfamily protein
PGSC0003DMG400001848	1294	Major pollen allergen Ory s 1	51	61.96	3.003	151	151.826	8.749	1417	1209.5	64.25	56	70.946	3.997	322	261.36	14.802	4041	3675.41	196.438	PF03330	PTHR31692,PTHR31692:SF2					AT4G17030.1	AT-EXPR,ATEXLB1,ATEXPR1,ATHEXP BETA 3.1,EXLB1,EXPR	expansin-like B1
PGSC0003DMG400001858	979	Hypothetical protein	124	153.661	10.455	728	736.864	49.956	632	539.833	35.762	181	229.308	15.394	778	631.484	41.45	419	381.187	26.056	PF04570	PTHR33059,PTHR33059:SF32					AT4G17670.1		Protein of unknown function (DUF581)
PGSC0003DMG400001952	967	Hypothetical protein	10	12.392	0.856	49	49.597	3.415	88	74.313	5.064	4	5.068	0.347	43	34.902	2.397	56	50.946	3.54	PF06749	PTHR31769,PTHR31769:SF6					AT1G31720.1		Protein of unknown function (DUF1218)
PGSC0003DMG400001980	841	Hypothetical protein	143	175.966	25.585	517	523.295	95	608	519.333	89.222	164	207.771	29.827	931	754.861	123.925	587	533.117	91.835		PTHR34213,PTHR34213:SF2					AT5G04830.1		Nuclear transport factor 2 (NTF2) family protein
PGSC0003DMG400001982	3163	NBS-coding resistance gene analog	30	37.176	0.774	104	104.312	2.231	182	155.234	3.384	69	86.609	1.728	406	329.538	6.934	389	353.037	7.613	PF00931	PTHR23155,PTHR23155:SF634				GO:0043531	AT3G46530.1	RPP13	NB-ARC domain-containing disease resistance protein
PGSC0003DMG400002047	1068	AT-hook1 protein	56	68.786	4.201	181	182.845	11.13	256	217.85	12.988	75	94.063	5.675	703	570.536	33.735	813	739.592	45.353	PF03479	PTHR31100,PTHR31100:SF1					AT5G49700.1		Predicted AT-hook DNA-binding family protein
PGSC0003DMG400002515	1854	DNA binding protein	43	53.286	2.015	155	156.887	5.92	207	176.813	6.352	11	12.669	0.492	136	109.576	4.03	116	105.532	4.137	PF00010	PTHR12565,PTHR12565:SF174				GO:0046983	AT3G21330.1		basic helix-loop-helix (bHLH) DNA-binding superfamily protein
PGSC0003DMG400002552	1035	Delta TIP	3137	3887.38	246.767	9301	9414.25	595.618	10168	8685.16	537.75	2371	3003.81	188.304	13559	11005.5	675.581	16938	15409.4	982.416	PF00230	PTHR19139,PTHR19139:SF99	KOG0223		K09873	GO:0016020,GO:0006810,GO:0005215	AT3G16240.1	AQP1,ATTIP2;1,DELTA-TIP,DELTA-TIP1,TIP2;1	delta tonoplast integral protein
PGSC0003DMG400002566	1594	Coatomer subunit beta'-2	10	12.392	0.656	56	55.67	2.883	830	708.958	36.336	109	138.091	7.163	212	172.075	8.642	2844	2587.34	136.145	PF00400	PTHR19876			K17302	GO:0005515	AT1G52360.1		Coatomer, beta\' subunit
PGSC0003DMG400002730	2154	Hypothetical protein	1347	1669.21	55.375	3682	3725.82	125.292	5262	4494.62	155.757	2058	2606	88.846	7866	6383.83	213.817	4823	4387.75	142.518	PF01925	PTHR14255,PTHR14255:SF5				GO:0016021	AT2G36630.1		Sulfite exporter TauE/SafE family protein
PGSC0003DMG400002732	940	VQ motif-containing protein	12	14.87	1.065	110	111.339	7.944	139	118.729	8.268	39	49.409	3.489	1016	824.663	56.875	360	327.512	23.572	PF05678	PTHR34794,PTHR34794:SF1					AT4G37710.1		VQ motif-containing protein
PGSC0003DMG400002800	1302	Nicotianamine synthase	263	325.91	15.679	817	826.948	39.683	1056	902	42.579	422	534.63	25.477	2708	2198.02	103.079	796	724.165	34.953	PF03059	PTHR32266,PTHR32266:SF12		2.5.1.43	K05953	GO:0030418,GO:0030410	AT1G09240.1	ATNAS3,NAS3	nicotianamine synthase 3
PGSC0003DMG400002914	2791	EIN3-binding F-box protein 1	1380	1710.1	35.003	4491	4545.68	92.944	4461	3810.44	77.364	1354	1715.38	34.969	7103	5765.34	116.725	4810	4375.92	89.694	PF00646,PF13516	PTHR24006,PTHR24006:SF501	KOG1947		K14515	GO:0005515	AT2G25490.1	EBF1,FBL6	EIN3-binding F box protein 1
PGSC0003DMG400003040	739	Osmotin	19	23.545	2.314	92	93.12	9.106	744	635.5	60.117	43	54.477	5.252	239	193.991	18.112	790	718.706	71.121	PF00314	PTHR31048,PTHR31048:SF19					AT4G11650.1	ATOSM34,OSM34	osmotin 34
PGSC0003DMG400003044	914	Osmotin	65	80.548	5.979	266	269.239	19.907	7449	6362.68	458.738	119	150.761	11.028	891	723.204	51.622	15706	14288.6	1065.97	PF00314	PTHR31048,PTHR31048:SF25					AT4G11650.1	ATOSM34,OSM34	osmotin 34
PGSC0003DMG400003056	638	Ethylene-responsive proteinase inhibitor 1	74	90.462	13.47	295	298.592	40.901	1752	1496.49	210.171	30	36.74	5.765	487	395.287	59.138	2745	2497.28	391.354	PF00280	PTHR33091,PTHR33091:SF1				GO:0009611,GO:0004867	AT2G38870.1		Serine protease inhibitor, potato inhibitor I-type family protein
PGSC0003DMG400003058	934	Osmotin OSML15	53	65.678	4.742	313	316.811	22.789	1848	1578.5	110.795	0	0	0	200	162.335	11.284	1806	1643.02	119.221	PF00314	PTHR31048,PTHR31048:SF19					AT4G11650.1	ATOSM34,OSM34	osmotin 34
PGSC0003DMG400003313	2649	Serine-threonine protein kinase, plant-type	19	22.306	0.531	181	182.192	4.064	305	260.521	5.621	17	21.537	0.464	400	324.671	6.95	196	178.312	3.968	PF08276,PF00954,PF01453,PF00069	PTHR27002,PTHR27002:SF136	KOG1187	2.7.11.1		GO:0048544,GO:0006468,GO:0005524,GO:0004672	AT4G00340.1	RLK4	receptor-like protein kinase 4
PGSC0003DMG400003429	2017	Atypical receptor-like kinase 1	84	104.093	3.038	234	236.849	6.902	739	631.229	18.211	122	154.561	4.485	891	723.204	20.781	1541	1401.93	40.996	PF00560,PF08263,PF13855,PF00069	PTHR27008,PTHR27008:SF19	KOG1187	2.7.11.1		GO:0005515,GO:0006468,GO:0005524,GO:0004672	AT1G48480.1	RKL1	receptor-like kinase 1
PGSC0003DMG400003568	1201	Cellular nucleic acid binding protein	49	59.482	3.15	145	145.761	7.698	212	180.233	9.348	60	74.747	3.917	110	89.284	4.598	280	253.824	13.491	PF00313,PF00098	PTHR11544,PTHR11544:SF50	KOG3070		K09250	GO:0006355,GO:0003677,GO:0008270,GO:0003676	AT4G36020.1	CSDP1	cold shock domain protein 1
PGSC0003DMG400003663	4986	Hypothetical protein	174	214.382	8.062	459	464.589	14.43	617	527.02	16.811	107	135.558	5.639	862	699.665	21.444	638	580.423	29.843		PTHR33872,PTHR33872:SF1					AT2G17710.1
PGSC0003DMG400003682	618	DNA binding protein	60	74.352	9.421	300	303.653	38.219	325	277.604	33.486	84	106.419	13.153	384	311.684	36.975	113	102.802	13.139	PF00249	PTHR24078,PTHR24078:SF279					AT1G75250.1	ATRL6,RL6,RSM3	RAD-like 6
PGSC0003DMG400003697	1462	Hypothetical protein	220	272.624	11.454	614	621.476	26.052	700	597.916	24.707	224	283.785	11.824	514	417.202	17.141	389	353.895	14.911		PTHR33640,PTHR33640:SF1					AT5G66440.1
PGSC0003DMG400003917	2055	Tellurite resistance protein tehA	38	47.09	1.346	172	174.094	4.969	142	121.292	3.428	38	48.142	1.368	146	118.505	3.336	99	90.066	2.58	PF03595	PTHR31269,PTHR31269:SF11				GO:0055085,GO:0016021,GO:0008308,GO:0006873	AT1G12480.1	CDI3,OZS1,RCD3,SLAC1	C4-dicarboxylate transporter/malic acid transport protein
PGSC0003DMG400004022	1009	Hypothetical protein	735	910.813	90.164	2537	2567.89	252.796	3071	2623.15	244.606	773	979.31	87.014	3681	2986.97	250.324	2600	2365.36	230.872	PF07939	PTHR31865,PTHR31865:SF1					AT4G33985.1		Protein of unknown function (DUF1685)
PGSC0003DMG400004030	1146	Ubiquitin-protein ligase	23	28.502	1.597	87	88.059	4.92	142	121.292	6.649	47	59.544	3.3	220	178.569	9.714	227	206.514	11.617	PF12937	PTHR24006				GO:0005515	AT5G67140.1		F-box/RNI-like superfamily protein
PGSC0003DMG400004036	1378	ATP binding protein	5	6.196	0.279	43	43.524	1.954	66	56.375	2.493	6	7.601	0.339	74	60.064	2.639	96	87.336	3.943	PF00069	PTHR24361,PTHR24361:SF303	KOG0198	2.7.11.25		GO:0006468,GO:0005524,GO:0004672	AT4G36950.1	MAPKKK21	mitogen-activated protein kinase kinase kinase 21
PGSC0003DMG400004061	3094	Transcription factor BIM1	13	14.87	0.331	63	62.755	1.496	70	58.938	1.389	29	35.473	0.786	132	107.141	2.468	127	115.539	2.766		PTHR12565,PTHR12565:SF153					AT5G08130.4	BIM1	basic helix-loop-helix (bHLH) DNA-binding superfamily protein
PGSC0003DMG400004065	1754	ADP,ATP carrier protein	116	143.748	5.385	380	384.627	13.101	382	326.292	10.985	190	240.71	8.158	785	636.354	21.612	382	346.616	12.212	PF00153	PTHR24089,PTHR24089:SF316	KOG0749		K05863		AT5G17400.1	ER-ANT1	endoplasmic reticulum-adenine nucleotide transporter 1
PGSC0003DMG400004259	871	Thaumatin	0	0	0	34	33.465	2.632	1846	1576.44	120.713	320	405.179	31.506	50	39.888	3.022	5011	4558	361.927	PF00314	PTHR31048,PTHR31048:SF36					AT4G11650.1	ATOSM34,OSM34	osmotin 34
PGSC0003DMG400004287	1245	Metal tolerance protein	2	2.478	0.126	35	35.426	1.792	37	31.604	1.572	6	7.601	0.382	69	56.006	2.766	39	35.48	1.806	PF16916,PF01545	PTHR11562,PTHR11562:SF45	KOG1485			GO:0055085,GO:0016021,GO:0008324,GO:0006812	AT3G58060.1		Cation efflux family protein
PGSC0003DMG400004311	2229	9-cis-epoxycarotenoid dioxygenase	3	3.718	0.115	36	36.438	1.142	509	433.917	13.502	61	76.014	2.371	198	160.712	4.571	1131	1028.93	32.658	PF03055	PTHR10543,PTHR10543:SF30	KOG1285	1.13.11.51			AT3G63520.1	ATCCD1,ATNCED1,CCD1,NCED1	carotenoid cleavage dioxygenase 1
PGSC0003DMG400004396	2337	Kinase	67	82.523	2.048	203	204.614	5.071	259	221.2	5.436	38	47.229	1.166	275	222.991	5.461	259	234.721	5.835	PF00139,PF00069	PTHR27007,PTHR27007:SF35	KOG1187	2.7.11.1		GO:0030246,GO:0006468,GO:0005524,GO:0004672	AT5G10530.1		Concanavalin A-like lectin protein kinase family protein
PGSC0003DMG400004553	1844	Kinase	78	96.263	3.105	280	283.129	9.117	325	277.242	8.829	54	68.412	2.193	431	349.409	11.078	439	398.565	12.884	PF00069	PTHR27009,PTHR27009:SF19		3.1.4.46		GO:0006468,GO:0005524,GO:0004672	AT5G38280.1	PR5K	PR5-like receptor kinase
PGSC0003DMG400004649	2766	Transcription factor || GRAS family transcription factor	113	138.791	3.173	407	411.955	9.708	381	325.437	7.748	132	167.23	3.767	546	443.175	10.349	392	356.624	8.214	PF03514	PTHR31636,PTHR31636:SF48					AT1G50420.1	SCL-3,SCL3	scarecrow-like 3
PGSC0003DMG400004662	1700	DNA binding protein	347	430.003	15.2	976	987.884	34.856	1267	1082.23	37.726	301	381.336	13.386	1591	1291.38	44.799	928	844.252	29.916	PF00447	PTHR10015,PTHR10015:SF157	KOG0627		K09419	GO:0043565,GO:0006355,GO:0005634,GO:0003700	AT4G13980.1	AT-HSFA5,HSFA5	winged-helix DNA-binding transcription factor family protein
PGSC0003DMG400004703	827	Hypothetical protein	11	13.631	1.152	69	69.84	5.876	325	277.604	22.699	23	29.139	2.422	248	201.296	16.274	507	461.246	39.207	PF03242					GO:0006950	AT4G15910.1	ATDI21,DI21	drought-induced 21
PGSC0003DMG400004795	2115	Nitrate transporter	178	220.578	6.108	1415	1432.23	39.813	1196	1021.5	27.979	214	271.111	7.466	2597	2107.12	57.494	1370	1245.45	34.555	PF00854	PTHR11654,PTHR11654:SF78		3.6.3.26	K14638	GO:0016020,GO:0006810,GO:0005215	AT1G12110.1	ATNRT1,B-1,CHL1,CHL1-1,NRT1,NRT1.1	nitrate transporter 1.1
PGSC0003DMG400004928	2815	S-locus-specific glycoprotein S13	9	11.153	0.226	56	56.682	1.148	64	54.667	1.1	7	8.868	0.179	53	43.019	0.863	29	26.383	0.536	PF08276,PF01453,PF00954,PF07714	PTHR27002,PTHR27002:SF97	KOG1187	2.7.11.1		GO:0048544,GO:0006468,GO:0004672	AT4G27290.1		S-locus lectin protein kinase family protein
PGSC0003DMG400004930	3084	Secreted glycoprotein 3	73	90.462	1.724	312	315.799	5.99	1013	864.416	16.297	126	159.629	3.005	1372	1113.62	20.881	3632	3304.23	62.787	PF08276,PF00954,PF01453,PF07714	PTHR27002,PTHR27002:SF152		2.7.11.1		GO:0048544,GO:0006468,GO:0004672	AT4G27290.1		S-locus lectin protein kinase family protein
PGSC0003DMG400004966	3290	Receptor protein kinase CLAVATA1	373	462.222	7.934	1809	1831.03	31.399	2334	1993.62	33.986	404	511.826	8.755	3100	2516.2	42.793	3163	2877.55	49.448	PF00560,PF08263,PF00069	PTHR27000,PTHR27000:SF182	KOG1187	2.7.11.1		GO:0005515,GO:0006468,GO:0005524,GO:0004672	AT1G09970.1	LRR XI-23,RLK7	Leucine-rich receptor-like protein kinase family protein
PGSC0003DMG400005035	1783	ARF GAP-like zinc finger-containing protein ZIGA3	78	96.658	3.424	284	286.446	10.317	316	269.916	9.655	65	81.081	2.919	233	188.309	6.645	392	355.714	12.839	PF01412	PTHR23180,PTHR23180:SF262	KOG0702		K12486	GO:0005096	AT5G54310.1	AGD5,NEV	ARF-GAP domain 5
PGSC0003DMG400005102	2984	Hypothetical protein	91	112.767	2.148	269	272.275	5.182	307	262.229	4.958	77	97.551	1.851	262	212.659	4.01	101	91.885	1.753		PTHR34454,PTHR34454:SF2					AT5G64510.1
PGSC0003DMG400005111	860	PR1 protein	2	1.239	0.471	46	45.94	14.774	1806	1542.01	385.629	62	78.364	13.674	455	369.016	49.421	6469	5885.02	880.294	PF00188	PTHR10334,PTHR10334:SF223	KOG3017		K13449		AT2G14580.1	ATPRB1,PRB1	basic pathogenesis-related protein 1
PGSC0003DMG400005157	4390	Hypothetical protein	215	266.429	3.644	685	692.328	9.426	1948	1663.06	22.648	256	323.059	4.39	732	594.148	8.063	3928	3573.52	49.192
PGSC0003DMG400005170	1972	NBS-coding resistance gene analog	1	0.004	0	38	38.45	1.149	25	21.347	0.631	7	8.861	0.264	43	34.895	1.028	1	0.458	0.014	PF00931	PTHR23155,PTHR23155:SF569				GO:0043531	AT3G46530.1	RPP13	NB-ARC domain-containing disease resistance protein
PGSC0003DMG400005219	1618	Hypothetical protein	55	68.156	2.549	259	262.154	9.783	365	311.771	11.487	13	16.47	0.611	68	55.194	2.023	134	121.907	4.57
PGSC0003DMG400005298	6954	Hypothetical protein	3	2.478	0.319	79	79.133	0.956	41	34.817	1.258	88	110.906	0.87	186	150.618	1.254	40	36.008	1.163
PGSC0003DMG400005327	993	Auxin-responsive protein IAA16	99	122.681	8.2	608	615.403	40.988	1282	1095.04	71.295	68	86.149	5.683	231	187.497	12.098	342	311.136	20.891	PF02309	PTHR31734,PTHR31734:SF30			K14484	GO:0006355,GO:0005634	AT3G04730.1	IAA16	indoleacetic acid-induced protein 16
PGSC0003DMG400005390	1795	Calmodulin-binding protein	2	2.478	0.082	47	47.572	1.579	632	539.833	17.712	279	353.464	11.674	1079	875.799	28.605	4050	3684.51	122.768	PF07887	PTHR31713,PTHR31713:SF15				GO:0006950,GO:0005516	AT1G73805.1		Calmodulin binding protein-like
PGSC0003DMG400005716	1540	Hypothetical protein	866	1073.15	42.462	2773	2806.76	110.827	2955	2524.06	98.325	720	912.165	35.811	2658	2157.44	83.589	1778	1617.54	64.176		PTHR34539,PTHR34539:SF2					AT1G13360.1
PGSC0003DMG400005762	584	Hypothetical protein	1	1.239	0.171	26	26.317	3.603	526	449.291	58.737	80	101.352	13.604	1046	849.013	109.006	2102	1912.3	266.209		PTHR35735,PTHR35735:SF2
PGSC0003DMG400005956	2519	Auxin efflux carrier	189	234.209	5.356	510	516.21	11.791	661	564.604	12.795	149	188.767	4.297	205	166.394	3.759	242	220.161	5.043	PF03547	PTHR31752,PTHR31752:SF12				GO:0055085,GO:0016021	AT1G70940.1	ATPIN3,PIN3	Auxin efflux carrier family protein
PGSC0003DMG400005992	695	Hypothetical protein	7	8.674	0.928	44	44.536	4.74	59	50.396	5.173	15	19.003	1.991	70	56.817	5.75	365	332.06	35.798	PF14009	PTHR33052,PTHR33052:SF31					AT3G03280.1
PGSC0003DMG400006134	1518	ATP binding protein	5	4.957	0.245	36	36.438	1.642	44	37.583	1.737	15	19.003	0.759	32	25.974	1.171	60	54.585	2.343	PF00069	PTHR13902,PTHR13902:SF60	KOG0198	2.7.11.1	K08867	GO:0006468,GO:0005524,GO:0004672	AT5G55560.1		Protein kinase superfamily protein
PGSC0003DMG400006226	1584	Leucine-rich repeat family protein	1213	1502.33	57.555	6912	6995.52	267.464	4871	4160.14	156.986	735	931.168	35.404	7726	6270.75	235.392	2339	2127.86	81.733		PTHR27000,PTHR27000:SF43					AT3G19320.1		Leucine-rich repeat (LRR) family protein
PGSC0003DMG400006239	4881	26S proteasome regulatory complex ATPase RPT3	51	62.462	1.782	180	181.811	4.702	193	164.277	3.437	10	12.669	0.303	30	23.629	0.45	31	27.769	0.502	PF00004	PTHR23073,PTHR23073:SF8		3.6.4.8		GO:0005524	AT5G58290.1	RPT3	regulatory particle triple-A ATPase 3
PGSC0003DMG400006303	1337	Zinc finger protein	221	272.625	12.712	763	771.278	36.577	753	642.333	31.155	156	196.369	9.907	1580	1281.64	62.069	742	675.038	33.411	PF00657	PTHR22835,PTHR22835:SF174				GO:0016788	AT1G53920.1	GLIP5	GDSL-motif lipase 5
PGSC0003DMG400006429	1582	Tyrosine specific protein phosphatase family protein	69	84.266	4.48	252	255.068	13.957	279	238.312	12.876	39	49.409	3.411	227	184.251	11.784	158	143.741	8.583	PF13350	PTHR31126,PTHR31126:SF15	KOG1572	3.1.3.48	K18045		AT1G05000.1		Phosphotyrosine protein phosphatases superfamily protein
PGSC0003DMG400006569	1432	DNA binding protein	219	271.385	14.335	572	578.965	28.559	707	603.042	27.984	152	192.568	9.635	1277	1036.51	50.491	687	625.002	33.152	PF00010	PTHR16223,PTHR16223:SF10				GO:0046983	AT1G05805.1		basic helix-loop-helix (bHLH) DNA-binding superfamily protein
PGSC0003DMG400006576	4396	Tospovirus resistance protein A || Tospovirus resistance protein B	117	144.195	4.289	389	392.914	12.033	391	333.918	9.943	262	331.483	9.35	718	582.724	15.628	498	452.726	12.195	PF00931	PTHR23155,PTHR23155:SF594				GO:0043531	AT3G50950.2	ZAR1	HOPZ-ACTIVATED RESISTANCE 1
PGSC0003DMG400006580	972	Tospovirus resistance protein B	41	50.807	3.488	161	162.961	11.148	187	159.729	10.675	71	89.95	6.092	233	189.121	12.522	131	119.178	8.221		PTHR23155,PTHR23155:SF594					AT1G58390.1		Disease resistance protein (CC-NBS-LRR class) family
PGSC0003DMG400006643	642	Hypothetical protein	430	532.857	63.855	1108	1121.49	133.551	1724	1472.58	168.439	572	724.664	84.82	2498	2027.57	228.277	2290	2083.34	251.707	PF07107	PTHR33703					AT3G10985.1	ATWI-12,SAG20,WI12	senescence associated gene 20
PGSC0003DMG400006708	1287	HSR203J protein	2	2.478	0.121	25	25.304	1.231	544	464.666	22.231	35	44.341	2.142	283	229.704	10.917	1856	1688.5	82.625	PF12695	PTHR23024,PTHR23024:SF219	KOG1515	3.1.1.1			AT5G62180.1	AtCXE20,CXE20	carboxyesterase 20
PGSC0003DMG400006709	1253	CXE carboxylesterase	212	262.711	13.226	565	571.88	28.716	1209	1032.69	50.971	292	369.934	18.44	2074	1683.42	82.521	2916	2652.84	134.018	PF07859	PTHR23024,PTHR23024:SF219	KOG1515	3.1.1.1		GO:0016787,GO:0008152	AT5G62180.1	AtCXE20,CXE20	carboxyesterase 20
PGSC0003DMG400006727	5657	Cyclic nucleotide-gated ion channel 15	39	48.329	0.851	129	129.558	1.751	173	146.917	1.922	42	53.21	0.877	201	163.147	2.396	126	114.629	1.825	PF00520	PTHR10217,PTHR10217:SF538			K05391	GO:0055085,GO:0016020,GO:0006811,GO:0005216	AT2G28260.1	ATCNGC15,CNGC15	cyclic nucleotide-gated channel 15
PGSC0003DMG400006913	1717	Nitrate transporter	6	6.196	0.245	159	159.924	6.184	490	417.687	14.679	11	12.669	0.44	446	362.008	12.658	952	866.087	31.161	PF07690	PTHR23515,PTHR23515:SF5	KOG2533		K02575	GO:0055085,GO:0016021	AT5G14570.1	ATNRT2.7,NRT2.7	high affinity nitrate transporter 2.7
PGSC0003DMG400007074	2072	CYP72A58 || CYP72A57	540	667.929	27.978	1535	1553.69	66.519	2627	2243.89	94.234	514	651.185	24.594	5345	4337.59	159.008	5316	4836.25	183.896	PF00067	PTHR24282,PTHR24282:SF21	KOG0157	1.3.3.9		GO:0055114,GO:0020037,GO:0016705,GO:0005506	AT3G14690.1	CYP72A15	cytochrome P450, family 72, subfamily A, polypeptide 15
PGSC0003DMG400007373	2183	Beta-ketoacyl-coa synthase family protein	131	161.096	4.743	386	389.687	11.355	670	571.437	16.633	171	215.372	5.876	480	388.793	11.356	1659	1508.37	43.707	PF08541,PF08392	PTHR31561,PTHR31561:SF19		2.3.1.199,2.3.1.119	K15397	GO:0016747,GO:0008610,GO:0016020,GO:0006633	AT2G26640.1	KCS11	3-ketoacyl-CoA synthase 11
PGSC0003DMG400007389	1836	CBL-interacting protein kinase 6	30	37.176	1.205	225	227.74	7.369	214	182.792	5.849	17	21.537	0.694	444	360.384	11.481	118	107.351	3.487	PF03822,PF00069	PTHR24347,PTHR24347:SF199	KOG0583	2.7.11.1	K07198	GO:0007165,GO:0006468,GO:0005524,GO:0004672	AT5G10930.1	CIPK5,SnRK3.24	CBL-interacting protein kinase 5
PGSC0003DMG400007401	2604	Transcription factor || MYB-CC type transfactor	285	351.933	16.827	720	728.766	33.568	919	784.979	35.691	280	354.731	17.42	1122	909.889	41.895	1027	933.408	44.812	PF14379,PF00249	PTHR31314,PTHR31314:SF5					AT2G01060.1		myb-like HTH transcriptional regulator family protein
PGSC0003DMG400007464	387	Hypothetical protein	131	162.335	45.885	1525	1543.57	429.907	1842	1573.37	399.784	99	125.423	33.566	1275	1034.89	253.956	322	292.941	84.425
PGSC0003DMG400007546	4123	Hypothetical protein	56	68.266	0.923	349	353.049	4.77	316	269.637	3.626	133	167.816	2.263	352	285.359	3.83	156	141.375	1.913
PGSC0003DMG400007572	1390	Hydroxyphenylpyruvate reductase	181	224.296	9.993	522	527.344	24.545	715	610.729	27.491	245	310.389	13.81	657	533.272	23.81	228	207.424	9.269	PF00389,PF02826	PTHR10996,PTHR10996:SF139	KOG0069	1.1.1.237	K15919	GO:0055114,GO:0051287,GO:0016616,GO:0008152	AT1G79870.1		D-isomer specific 2-hydroxyacid dehydrogenase family protein
PGSC0003DMG400007614	3263	Alternative oxidase	269	333.345	5.931	781	789.498	14.019	3397	2900.75	51.214	363	459.883	8.148	2261	1835.2	32.333	6701	6095.36	108.549	PF01786	PTHR31803,PTHR31803:SF4		1.10.3.11	K17893	GO:0055114,GO:0009916	AT3G22370.1	AOX1A,ATAOX1A	alternative oxidase 1A
PGSC0003DMG400007759	816	ARF GTPase activator	395	489.485	42.107	1057	1069.87	91.618	1304	1113.83	92.645	180	228.041	19.287	980	795.443	65.403	536	487.628	42.194	PF00168	PTHR23180,PTHR23180:SF289	KOG1030			GO:0005515	AT1G70810.1		Calcium-dependent lipid-binding (CaLB domain) family protein
PGSC0003DMG400007786	1268	2,4-D inducible glutathione S-transferase	39	48.329	2.64	139	140.693	7.798	207	175.958	9.549	38	48.142	2.651	181	146.913	7.919	112	101.893	5.678	PF00043,PF02798	PTHR11260,PTHR11260:SF174	KOG0406	2.5.1.18	K00799	GO:0005515	AT1G17180.1	ATGSTU25,GSTU25	glutathione S-transferase TAU 25
PGSC0003DMG400007880	1049	Senescence-associated protein	265	327.15	31.465	1390	1405.91	149.581	1009	861.854	93.43	408	516.893	64.451	2556	2073.83	254.737	1228	1117.18	126.642	PF00335	PTHR32191,PTHR32191:SF2				GO:0016021	AT4G28050.1	TET7	tetraspanin7
PGSC0003DMG400007972	1977	ABA 8'-hydroxylase CYP707A2	88	109.05	3.254	247	248.995	7.419	330	281.875	8.313	80	101.352	3.007	527	426.942	12.54	142	128.275	3.837	PF00067	PTHR24286,PTHR24286:SF60	KOG0157	1.14.13.93		GO:0055114,GO:0020037,GO:0016705,GO:0005506	AT3G19270.1	CYP707A4	cytochrome P450, family 707, subfamily A, polypeptide 4
PGSC0003DMG400008088	999	Carboxy-lyase	144	178.445	11.837	377	381.59	25.225	652	556.916	35.994	227	287.585	18.829	425	344.962	22.096	773	703.24	46.862	PF03641	PTHR31223,PTHR31223:SF9			K06966		AT2G37210.1		lysine decarboxylase family protein
PGSC0003DMG400008552	913	Hypothetical protein	84	104.093	7.737	354	358.31	26.53	340	290.417	20.967	81	102.619	7.517	426	345.774	24.715	103	93.705	7.001	PF04570	PTHR33059,PTHR33059:SF4					AT1G78020.1		Protein of unknown function (DUF581)
PGSC0003DMG400008557	1642	Glycosyltransferase	821	1017.38	37.41	3677	3721.77	136.587	2728	2330.17	84.446	369	467.484	17.065	2497	2026.76	73.081	2118	1926.86	71.029	PF00201	PTHR11926,PTHR11926:SF286		2.4.1.324		GO:0016758,GO:0008152	AT1G22360.1	AtUGT85A2,UGT85A2	UDP-glucosyl transferase 85A2
PGSC0003DMG400008584	1475	Hypothetical protein	1006	1245.4	56.592	3086	3122.57	141.277	4001	3417.52	152.266	888	1125	50.591	4760	3862.76	171.171	3351	3048.59	138.859		PTHR26312,PTHR26312:SF89					AT5G20190.1		Tetratricopeptide repeat (TPR)-like superfamily protein
PGSC0003DMG400008878	1157	Hypothetical protein	25	30.98	1.716	97	98.181	5.423	428	365.583	19.814	46	58.277	3.193	199	161.524	8.689	1125	1023.47	56.907		PTHR34120,PTHR34120:SF2		2.7.11.17			AT2G36220.1
PGSC0003DMG400008988	1038	Aluminum-induced protein	1151	1426.32	90.218	2952	2987.94	188.366	4747	4054.73	250.176	1047	1326.44	82.859	7552	6129.78	374.979	2712	2467.25	156.733	PF13537	PTHR11772,PTHR11772:SF18					AT5G19140.1	AILP1,ATAILP1	Aluminium induced protein with YGL and LRDR motifs
PGSC0003DMG400009061	2826	N-acetyl-glutamate synthase	916	1133.87	30.413	3755	3799.71	95.827	3421	2921.25	73.59	570	722.131	17.127	2017	1637.15	39.763	863	784.208	19.231	PF00696,PF13508	PTHR30602,PTHR30602:SF4	KOG2436	2.3.1.1	K14682	GO:0008080	AT2G22910.1	NAGS1	N-acetyl-l-glutamate synthase 1
PGSC0003DMG400009471	1080	Hypothetical protein	413	510.551	34.49	1317	1333.04	89.633	1448	1236.83	81.3	412	521.961	34.819	1445	1172.87	76.46	617	561.319	38.068	PF04570	PTHR33059,PTHR33059:SF9					AT1G78020.1		Protein of unknown function (DUF581)
PGSC0003DMG400009474	5799	WD-repeat protein	335	415.133	8.047	1077	1089.1	20.839	1337	1141.17	21.767	487	616.978	11.461	1367	1108.75	21.148	721	655.933	12.756	PF00400	PTHR22847,PTHR22847:SF453	KOG4532	3.6.4.3		GO:0005515	AT1G78070.1		Transducin/WD40 repeat-like superfamily protein
PGSC0003DMG400009509	2752	Heat shock protein 83	27	33.459	0.695	129	130.571	2.71	939	802.062	16.531	169	214.105	4.431	1685	1367.67	28.108	3416	3107.72	64.674	PF02518,PF00183	PTHR11528,PTHR11528:SF53			K04079	GO:0051082,GO:0006950,GO:0006457,GO:0005524	AT5G52640.1	ATHS83,AtHsp90-1,ATHSP90.1,HSP81-1,HSP81.1,HSP83,HSP90.1	heat shock protein 90.1
PGSC0003DMG400009570	1026	Transcription factor Myb1 || MYB transcription factor	21	24.784	1.82	79	79.962	5.115	98	82.854	7.188	40	50.676	4.455	153	124.187	9.565	63	56.405	3.671	PF00249	PTHR12374,PTHR12374:SF19					AT5G56840.1		myb-like transcription factor family protein
PGSC0003DMG400009762	1778	Cytochrome P450	161	198.272	7.066	489	493.942	17.598	593	505.667	17.826	185	233.109	8.27	781	633.919	22.21	847	769.653	27.64	PF00067	PTHR24298,PTHR24298:SF178		1.14.13.121		GO:0055114,GO:0020037,GO:0016705,GO:0005506	AT3G48310.1	CYP71A22	cytochrome P450, family 71, subfamily A, polypeptide 22
PGSC0003DMG400009937	744	Hypothetical protein	123	152.422	14.994	368	372.481	36.092	444	379.25	35.559	94	119.088	11.378	383	310.872	28.871	139	126.456	12.398		PTHR33306,PTHR33306:SF5					AT5G42146.1
PGSC0003DMG400009958	957	Hypothetical protein	349	432.482	30.28	900	910.959	63.546	1107	945.562	64.409	330	418.076	28.87	1394	1131.48	76.348	845	768.743	54.08	PF05180	PTHR20922,PTHR20922:SF15			K17808	GO:0008270	AT5G27280.1		Zim17-type zinc finger protein
PGSC0003DMG400009959	1559	Ornithine decarboxylase	842	1043.41	40.709	2668	2700.49	105.144	4869	4158.94	159.782	499	632.181	24.475	1969	1598.19	61.074	4522	4113.91	160.932	PF00278,PF02784	PTHR11482,PTHR11482:SF6	KOG0622	4.1.1.17	K01581	GO:0003824	AT5G11880.1		Pyridoxal-dependent decarboxylase family protein
PGSC0003DMG400010048	933	Hypothetical protein	374	462.223	38.36	1092	1105.3	91.119	1338	1142.88	96.142	266	335.727	28.892	1195	969.954	83.09	571	519.47	43.254		PTHR34563,PTHR34563:SF1					AT3G19660.1
PGSC0003DMG400010051	2092	S-adenosylmethionine decarboxylase proenzyme	191	236.687	7.603	738	745.974	23.938	1478	1261.6	40.004	356	451.015	14.423	1632	1323.84	41.687	3508	3190.51	102.567	PF01536	PTHR11570,PTHR11570:SF4	KOG0788	4.1.1.50	K01611	GO:0008295,GO:0006597,GO:0004014	AT3G25570.1		Adenosylmethionine decarboxylase family protein
PGSC0003DMG400010296	1612	Patellin-4	62	76.831	4.149	228	230.776	10.158	229	194.75	10.617	27	34.206	1.73	231	187.497	9.112	75	67.322	4.13	PF00650	PTHR23324,PTHR23324:SF48	KOG1471				AT1G30690.1		Sec14p-like phosphatidylinositol transfer family protein
PGSC0003DMG400010464	894	Hypothetical protein	2	2.478	0.537	49	49.597	3.777	50	42.708	4.259	4	5.068	0.779	42	33.279	2.639	16	14.556	1.57	PF07939	PTHR33785,PTHR33785:SF2					AT2G42760.1
PGSC0003DMG400010471	2439	Subtilase	98	121.442	2.876	452	457.504	10.823	472	403.166	9.46	79	100.085	2.359	534	433.435	10.137	796	724.165	17.18	PF05922,PF00082	PTHR10795,PTHR10795:SF400		3.4.14.10		GO:0006508,GO:0004252	AT5G67090.1		Subtilisin-like serine endopeptidase family protein
PGSC0003DMG400010490	1190	Acidic class II 1,3-beta-glucanase	3	3.718	0.2	35	34.414	1.873	670	572.291	30.625	90	114.021	6.141	50	40.584	2.125	2234	2032.39	111.392	PF00332	PTHR32227,PTHR32227:SF96		3.2.1.39		GO:0005975,GO:0004553	AT4G16260.1		Glycosyl hydrolase superfamily protein
PGSC0003DMG400010735	1106	Hypothetical protein	77	95.419	5.583	254	257.093	14.996	285	243.437	13.919	60	76.014	4.396	159	129.057	7.321	158	143.741	8.444	PF08241	PTHR10108,PTHR10108:SF874				GO:0008168,GO:0008152	AT1G24480.1		S-adenosyl-L-methionine-dependent methyltransferases superfamily protein
PGSC0003DMG400010750	1022	ERF transcription factor	129	159.857	10.308	490	495.966	31.873	651	556.062	34.96	97	122.889	7.824	729	591.712	36.877	554	504.004	32.642	PF00847	PTHR31190,PTHR31190:SF31			K09286	GO:0006355,GO:0003700	AT4G17500.1	ATERF-1,ERF-1	ethylene responsive element binding factor 1
PGSC0003DMG400010759	604	Hypothetical protein	263	325.91	42.723	960	971.689	126.504	1229	1049.77	130.793	171	216.639	27.678	3329	2702.07	330.904	2601	2366.27	312.978
PGSC0003DMG400010859	2846	Lipoxygenase	77	95.419	1.912	264	267.214	6.109	6427	5489.73	118.244	239	301.521	6.418	2722	2209.38	48.254	27697	25196.5	534.78	PF00305	PTHR11771,PTHR11771:SF48		1.13.11.58		GO:0055114,GO:0046872,GO:0016702	AT1G55020.1	ATLOX1,LOX1	lipoxygenase 1
PGSC0003DMG400011016	1046	Soul heme-binding family protein	8	9.914	0.621	78	78.95	4.93	1205	1029.27	62.92	34	43.075	2.666	206	167.205	10.135	1929	1754.92	110.424	PF04832	PTHR11220					AT2G37970.1	SOUL-1	SOUL heme-binding family protein
PGSC0003DMG400011027	1718	UDP-glucuronosyltransferase || UGT protein	0	0	0	33	32.39	1.243	22	18.792	0.647	1	1.267	0.066	61	48.701	1.67	42	38.21	1.338	PF00201	PTHR11926,PTHR11926:SF322				GO:0016758,GO:0008152	AT5G59580.1	UGT76E1	UDP-glucosyl transferase 76E1
PGSC0003DMG400011052	1395	Zinc finger protein	19	23.545	1.045	97	98.181	4.346	139	117.875	5.139	26	32.939	1.449	148	120.128	5.206	43	39.12	1.741	PF13639	PTHR22763,PTHR22763:SF20		6.3.2.19		GO:0008270,GO:0005515	AT5G02750.1		RING/U-box superfamily protein
PGSC0003DMG400011125	474	Hypothetical protein	2	2.478	0.479	33	33.402	6.386	57	48.688	8.732	0	0	0	15	12.175	2.13	1	0.91	0.178
PGSC0003DMG400011159	780	GMP synthase [glutamine-hydrolyzing] subunit A	4	4.957	0.453	37	37.451	4.556	39	33.313	4.245	3	3.801	0.735	73	59.252	6.502	24	21.834	2.242	PF00117	PTHR11922,PTHR11922:SF42	KOG3179				AT4G30550.1		Class I glutamine amidotransferase-like superfamily protein
PGSC0003DMG400011175	2383	CBL-interacting serine/threonine-protein kinase	549	680.321	33.302	1433	1449.43	57.047	1943	1658.79	62.637	582	737.332	34.438	2532	2054.35	76.848	3015	2742	107.86	PF14531,PF03822	PTHR24347,PTHR24347:SF168	KOG0583	2.7.11.1		GO:0007165	AT4G30960.1	ATCIPK6,CIPK6,SIP3,SNRK3.14	SOS3-interacting protein 3
PGSC0003DMG400011355	851	UPF0497 membrane protein 6	79	97.897	7.969	303	306.689	24.859	300	256.25	20.205	68	86.149	6.901	595	482.947	37.666	191	173.763	14.223	PF04535	PTHR11615,PTHR11615:SF150					AT4G15620.1		Uncharacterised protein family (UPF0497)
PGSC0003DMG400011545	2185	E3 ubiquitin ligase PUB14	38	47.09	1.258	170	172.07	4.59	205	175.104	4.629	66	83.615	2.222	257	208.601	5.494	158	143.741	3.847	PF00514	PTHR23315,PTHR23315:SF64		6.3.2.19		GO:0005515	AT3G01400.1		ARM repeat superfamily protein
PGSC0003DMG400011548	844	Zinc finger DNA-binding protein	204	252.797	24.129	848	858.326	89.486	992	847.333	86.716	80	101.352	10.665	1094	887.974	89.284	1754	1595.71	183.313	PF13912	PTHR26374,PTHR26374:SF208					AT1G27730.1	STZ,ZAT10	salt tolerance zinc finger
PGSC0003DMG400011708	2784	Hypothetical protein	183	226.774	6.195	790	799.618	20.503	762	650.021	16.358	119	149.494	4.221	308	249.184	6.802	304	275.655	7.844	PF13855	PTHR27004,PTHR27004:SF39	KOG4579			GO:0005515	AT2G33060.1	AtRLP27,RLP27	receptor like protein 27
PGSC0003DMG400011949	1454	Non-specific lipid-transfer protein	46	57.003	4.81	280	282.397	23.661	3224	2752.98	224.31	511	646.117	53.173	4741	3847.35	309.464	16255	14787.2	1250.21	PF00234	PTHR33076,PTHR33076:SF11					AT3G51590.1	LTP12	lipid transfer protein 12
PGSC0003DMG400012169	2770	Na(+)/H(+) antiporter	127	157.379	3.248	567	573.904	11.83	613	523.604	10.717	108	136.825	2.812	709	575.479	11.745	828	753.277	15.566	PF00999	PTHR32468,PTHR32468:SF13				GO:0055085,GO:0016021,GO:0015299,GO:0006812	AT5G41610.1	ATCHX18,CHX18	cation/H+ exchanger 18
PGSC0003DMG400012292	918	Keratin-associated protein 6-2	6966	8632.28	637.941	19931	20173.7	1485.26	29047	24810.9	1781.12	7654	9695.55	707.237	40128	32571	2319.61	18245	16597.5	1248.54
PGSC0003DMG400012293	709	Methanol inducible protein	33	40.894	4.525	110	111.339	12.222	178	151.187	16.386	34	43.074	4.971	218	176.945	18.907	229	208.334	23.258
PGSC0003DMG400012294	1079	Methanol inducible protein	7128	8833.03	532.666	26478	26799.4	1616.83	29301	25028	1476.57	8362	10592.5	636.878	42221	34269.7	2007.88	21310	19386.9	1183.31
PGSC0003DMG400012481	655	Lipid binding protein	5	6.196	1.513	68	68.828	9.484	1791	1528.96	191.998	241	305.322	40.541	610	495.123	76.741	10495	9547.88	1348.01	PF14368	PTHR33044,PTHR33044:SF37					AT1G62790.1		Bifunctional inhibitor/lipid-transfer protein/seed storage 2S albumin superfamily protein
PGSC0003DMG400012492	2407	Serine protease	80	99.136	2.382	313	316.811	7.603	308	263.083	6.262	18	22.804	0.545	195	158.277	3.755	287	261.1	6.284	PF02225,PF00082	PTHR10795,PTHR10795:SF411		3.4.21.25		GO:0006508,GO:0004252	AT2G05920.1		Subtilase family protein
PGSC0003DMG400012554	1562	Caspase	22	26.023	1.11	102	102.23	4.497	262	222.938	9.612	85	106.419	4.874	571	462.656	19.943	175	158.297	7.032	PF00656	PTHR31773,PTHR31773:SF5	KOG1546			GO:0006508,GO:0004197	AT5G64240.2	AtMC3,MC3	metacaspase 3
PGSC0003DMG400012589	1225	Cationic peroxidase	16	19.827	1.025	195	197.374	10.181	2222	1897.96	96.184	28	35.473	1.816	1071	869.305	43.745	8608	7831.17	406.457	PF00141	PTHR31235,PTHR31235:SF27		1.11.1.7	K00430	GO:0055114,GO:0020037,GO:0006979,GO:0004601	AT2G41480.1		Peroxidase superfamily protein
PGSC0003DMG400012894	732	Hypothetical protein	4	4.957	0.494	44	44.536	4.412	64	54.667	5.237	1	1.267	0.124	7	5.682	0.537	22	20.015	2.007
PGSC0003DMG400012924	3304	Retrotransposon protein, unclassified	1	0.007	0	47	47.569	1.632	60	51.083	1.407	4	4.135	0.355	9	6.859	0.572	0	0	0	PF07727	PTHR11439,PTHR11439:SF185		2.7.7.49			AT4G23160.1	CRK8	cysteine-rich RLK (RECEPTOR-like protein kinase) 8
PGSC0003DMG400012977	952	VQ motif-containing protein	35	43.165	3.657	221	223.044	18.944	265	225.602	18.306	21	25.872	2.048	385	312.17	24.739	236	214.492	17.433	PF05678	PTHR34794,PTHR34794:SF1					AT4G37710.1		VQ motif-containing protein
PGSC0003DMG400013130	1798	Hypothetical protein	8	9.914	0.329	91	92.108	3.051	105	89.688	2.937	8	10.135	0.334	110	89.284	2.911	59	53.676	1.785	PF11250	PTHR33155,PTHR33155:SF3					AT5G22090.1		Protein of unknown function (DUF3049)
PGSC0003DMG400013134	1666	Hypothetical protein	15	18.588	0.672	130	131.583	4.75	147	125.562	4.477	9	11.402	0.409	124	100.648	3.571	40	36.39	1.319	PF11250	PTHR33155,PTHR33155:SF3					AT5G22090.1		Protein of unknown function (DUF3049)
PGSC0003DMG400013307	1520	Aspartic proteinase nepenthesin-1	396	490.724	19.711	1212	1226.76	49.172	1812	1547.75	61.191	394	499.157	19.891	3610	2930.15	115.21	1286	1169.94	47.122	PF00026	PTHR13683,PTHR13683:SF327	KOG1339	3.4.23.12		GO:0006508,GO:0004190	AT1G66180.1		Eukaryotic aspartyl protease family protein
PGSC0003DMG400013828	1904	Vacoular processing enzyme 1 || Vacoular processing enzyme 2	531	656.777	22.316	1599	1618.47	55.397	3012	2571.89	86.55	2493	3158.37	109.82	13548	10996.6	376.709	6657	6055.33	213.04	PF01650	PTHR12000,PTHR12000:SF17		3.4.22.34	K01369	GO:0008233,GO:0006508	AT4G32940.1	GAMMA-VPE,GAMMAVPE	gamma vacuolar processing enzyme
PGSC0003DMG400013857	2337	Trehalose 6-phosphate phosphatase	522	645.624	19.087	2024	2048.65	61.566	2464	2104.66	62.172	540	684.124	19.342	3261	2646.07	76.704	1854	1685.78	49.74	PF02358	PTHR10788,PTHR10788:SF38		3.1.3.12	K01087	GO:0005992,GO:0003824	AT5G51460.2	ATTPPA	Haloacid dehalogenase-like hydrolase (HAD) superfamily protein
PGSC0003DMG400013984	954	TMV induced protein 1-2	142	175.967	17.859	490	495.966	50.07	943	805.479	78.386	9	11.402	1.134	173	139.609	13.288	1103	1003.46	102.552	PF01477	PTHR31718,PTHR31718:SF5				GO:0005515	AT2G22170.1		Lipase/lipooxygenase, PLAT/LH2 family protein
PGSC0003DMG400014013	1749	Flavonoid 3-hydroxylase || Cytochrome P450 monooxygenase CYP736B || Cytochrome P450	8	9.914	0.577	52	52.44	2.846	1288	1099.67	58.096	122	153.455	6.918	376	304.963	14.14	4323	3932.14	186.548	PF00067	PTHR24298,PTHR24298:SF157		1.14.13.21		GO:0055114,GO:0020037,GO:0016705,GO:0005506	AT4G36220.1	CYP84A1,FAH1	ferulic acid 5-hydroxylase 1
PGSC0003DMG400014095	1115	Short-chain type alcohol dehydrogenase || 2,4-dienoyl-CoA reductase	425	526.661	32.99	1674	1694.39	105.917	4034	3445.71	211.278	680	860.222	53.428	6798	5517.78	335.198	7413	6743.1	425.732	PF13561	PTHR24322,PTHR24322:SF391	KOG1611	1.1.1.47			AT3G55290.1		NAD(P)-binding Rossmann-fold superfamily protein
PGSC0003DMG400014133	1499	F-box family protein	69	85.505	3.49	269	272.275	11.089	251	214.396	8.611	99	125.423	5.078	336	272.723	10.893	167	151.929	6.218	PF00646	PTHR32133,PTHR32133:SF106				GO:0005515	AT5G07610.1		F-box family protein
PGSC0003DMG400014272	1922	Cytochrome P450 || (S)-N-methylcoclaurine 3'-hydroxylase isozyme	123	152.422	5.19	460	465.6	15.548	961	820.854	27.746	141	178.632	6.132	1129	915.571	30.517	1609	1463.8	50.165	PF00067	PTHR24298,PTHR24298:SF122	KOG0156	1.14.13.71		GO:0055114,GO:0020037,GO:0016705,GO:0005506	AT2G45570.1	CYP76C2	cytochrome P450, family 76, subfamily C, polypeptide 2
PGSC0003DMG400014322	992	CEN 1	0	0	0	145	146.766	10.974	91	77.729	5.666	1	1.267	0.094	145	117.693	8.492	76	69.141	5.217	PF01161	PTHR11362,PTHR11362:SF22					AT5G62040.1		PEBP (phosphatidylethanolamine-binding protein) family protein
PGSC0003DMG400014487	4135	Zinc finger family protein	1611	1995.12	40.517	4547	4601.35	96.905	6444	5504.25	118.448	805	1018.58	37.263	3190	2588.43	91.98	1860	1692.14	62.889	PF13639,PF05495,PF14599	PTHR21319,PTHR21319:SF15	KOG1940	6.3.2.19	K10144	GO:0008270,GO:0005515	AT5G25560.1		CHY-type/CTCHY-type/RING-type Zinc finger protein
PGSC0003DMG400014539	1945	Nitrite transporter || Nitrate transporter	306	378.758	11.97	895	905.208	28.805	1185	1011.57	31.38	390	492.872	15.051	2867	2326.69	70.125	1070	972.961	30.366	PF00854	PTHR11654,PTHR11654:SF178			K14638	GO:0016020,GO:0006810,GO:0005215	AT1G68570.1		Major facilitator superfamily protein
PGSC0003DMG400014594	944	Ethylene response factor	29	35.937	2.56	127	128.546	9.123	404	345.083	23.905	7	8.868	0.623	95	77.109	5.291	249	226.529	16.216	PF00847	PTHR31190,PTHR31190:SF3			K14516	GO:0006355,GO:0003700	AT3G23240.1	ATERF1,ERF1	ethylene response factor 1
PGSC0003DMG400014702	1240	Male sterility MS5 family protein	4	4.957	0.265	44	43.524	2.32	46	38.438	1.996	5	6.334	0.335	18	14.61	0.94	21	18.195	0.976							AT5G48850.1	ATSDI1	Tetratricopeptide repeat (TPR)-like superfamily protein
PGSC0003DMG400014705	2993	Phytochrome-interacting factor	179	220.579	4.763	703	711.56	15.677	604	515.067	11.114	244	309.123	6.746	1059	858.754	18.724	424	384.826	8.447	PF00010	PTHR12565,PTHR12565:SF108				GO:0046983	AT2G20180.3	PIF1,PIL5	phytochrome interacting factor 3-like 5
PGSC0003DMG400014779	1656	Aromatic amino acid decarboxylase 1A || Aromatic amino acid decarboxylase 1B	4	4.957	0.207	103	103.242	5.349	1118	954.957	45.647	85	107.686	4.199	265	214.283	9.677	4294	3906.48	165.442	PF00282	PTHR11999,PTHR11999:SF82	KOG0629	4.1.1.28,4.1.1.53	K01590	GO:0030170,GO:0019752,GO:0016831	AT1G43710.1	emb1075	Pyridoxal phosphate (PLP)-dependent transferases superfamily protein
PGSC0003DMG400014824	2259	Glycerol-3-phosphate transporter	73	90.462	2.436	529	534.429	14.403	1204	1028.42	27.455	68	86.149	2.315	631	511.356	13.578	1240	1128.09	30.506	PF00083	PTHR11662,PTHR11662:SF302		3.6.3.20		GO:0055085,GO:0022857,GO:0016021	AT3G47420.1	ATPS3,PS3	phosphate starvation-induced gene 3
PGSC0003DMG400014867	1342	Peroxidase	210	260.232	12.081	925	936.263	43.359	1094	934.458	42.595	88	111.487	5.128	1099	892.032	40.404	1712	1557.5	72.535	PF00141	PTHR31517,PTHR31517:SF3		1.11.1.7	K00430	GO:0055114,GO:0020037,GO:0006979,GO:0004601	AT5G67400.1	RHS19	root hair specific 19
PGSC0003DMG400014936	1242	Zinc/iron transporter	82	101.615	5.17	241	243.934	12.377	366	312.625	15.59	44	55.743	2.808	258	209.413	10.371	344	312.956	15.977	PF02535	PTHR11040,PTHR11040:SF35	KOG1558		K14709	GO:0055085,GO:0046873,GO:0030001,GO:0016020	AT3G12750.1	ZIP1	zinc transporter 1 precursor
PGSC0003DMG400015061	1957	Cytochrome P450	45	55.764	1.683	262	265.19	7.991	337	287.854	8.585	44	55.743	1.672	451	366.066	10.872	222	201.966	6.108	PF00067	PTHR24296,PTHR24296:SF1	KOG0157			GO:0055114,GO:0020037,GO:0016705,GO:0005506	AT2G23180.1	CYP96A1	cytochrome P450, family 96, subfamily A, polypeptide 1
PGSC0003DMG400015318	512	Metallothionein	1506	1866.24	316.621	4548	4603.38	774.089	6356	5429.08	862.865	781	989.445	162.393	4273	3468.29	539.273	2843	2586.43	443.93		PTHR33357					AT3G15353.1	ATMT3,MT3	metallothionein 3
PGSC0003DMG400015536	1344	MYB1-2	146	180.923	8.887	386	389.688	18.537	487	415.125	19.695	114	144.426	6.959	587	476.454	22.659	60	54.585	2.652	PF00249	PTHR10641,PTHR10641:SF484			K09422		AT3G46130.1	ATMYB48,ATMYB48-1,ATMYB48-2,ATMYB48-3,MYB48	myb domain protein 48
PGSC0003DMG400015850	1607	IDS4	91	112.767	5.677	576	582.001	29.263	1276	1089.92	54.63	137	173.565	8.785	890	722.392	35.747	1928	1753.1	91.638	PF03105	PTHR10783,PTHR10783:SF44					AT2G26660.1	ATSPX2,SPX2	SPX domain gene 2
PGSC0003DMG400015897	882	Abscisic acid receptor PYL4	92	114.007	8.859	444	449.406	34.779	462	394.625	29.745	68	86.149	6.592	663	538.141	40.141	315	286.573	22.387	PF10604	PTHR31213,PTHR31213:SF3			K14496		AT2G38310.1	PYL4,RCAR10	PYR1-like 4
PGSC0003DMG400016003	1464	Ethylene responsive element binding protein C2	351	434.96	18.245	1194	1208.54	50.582	1101	940.437	38.8	211	267.315	11.12	3024	2454.51	100.688	1829	1663.94	69.995	PF00847	PTHR31677,PTHR31677:SF10			K09286	GO:0006355,GO:0003700	AT5G47230.1	ATERF-5,ATERF5,ERF5	ethylene responsive element binding factor 5
PGSC0003DMG400016129	3077	ATP binding protein	92	114.007	2.466	427	432.199	9.605	628	535.562	11.43	208	263.514	5.679	1355	1099.01	22.889	628	571.326	11.251	PF04564,PF07714	PTHR27003,PTHR27003:SF81	KOG1187	2.7.11.1		GO:0016567,GO:0004842,GO:0006468,GO:0004672	AT5G65500.1		U-box domain-containing protein kinase family protein
PGSC0003DMG400016499	1010	Hypothetical protein	1	1.239	0.081	46	46.56	3.036	56	47.833	3.051	0	0	0	104	84.414	5.336	37	33.661	2.213	PF07911	PTHR33108,PTHR33108:SF14					AT5G25840.1		Protein of unknown function (DUF1677)
PGSC0003DMG400016536	954	Hypothetical protein	21	26.023	1.829	253	255.333	17.882	236	200.779	13.729	14	17.736	1.23	171	138.041	9.35	78	70.961	5.012		PTHR33132,PTHR33132:SF10					AT1G67910.2
PGSC0003DMG400016590	935	Stress enhanced protein 2	1390	1722.49	124.205	4023	4071.99	292.512	5669	4842.27	339.431	1598	2024.5	143.92	13127	10654.9	739.647	4569	4156.67	301.205		PTHR36490,PTHR36490:SF1					AT2G21970.1	2021-09-02	stress enhanced protein 2
PGSC0003DMG400016727	1252	Light-induced protein, chloroplastic	573	710.063	35.782	1594	1613.41	81.09	2093	1787.77	88.322	763	966.641	48.229	2644	2146.07	105.297	2493	2268.02	114.686	PF04755	PTHR31906,PTHR31906:SF7					AT4G04020.1	FIB	fibrillin
PGSC0003DMG400016749	1069	TMV-induced protein I	75	92.94	6.918	316	318.835	23.57	555	474.063	34.166	25	31.672	2.323	366	296.261	21.097	666	605.896	45.268	PF01477	PTHR31718,PTHR31718:SF5				GO:0005515	AT4G39730.1		Lipase/lipooxygenase, PLAT/LH2 family protein
PGSC0003DMG400016812	1121	AP2/ERF-domain protein	354	438.678	25.249	2011	2035.49	116.801	1698	1450.37	81.61	601	761.404	43.328	5258	4267.79	238.269	693	630.46	36.429	PF00847	PTHR31190,PTHR31190:SF27			K09286	GO:0006355,GO:0003700	AT3G16770.1	ATEBP,EBP,ERF72,RAP2.3	ethylene-responsive element binding protein
PGSC0003DMG400016884	2555	Protein ariadne-1	16	19.827	0.446	107	108.303	2.436	138	117.875	2.631	75	95.017	2.13	157	127.433	2.835	76	69.141	1.559	PF00097,PF01485	PTHR11685,PTHR11685:SF119	KOG1815	6.3.2.19	K11968	GO:0046872,GO:0016567,GO:0004842	AT2G16090.1	ARI2,ATARI2	RING/U-box superfamily protein
PGSC0003DMG400016951	2331	Transcription factor TGA7	210	258.993	9.267	653	660.951	23.48	652	556.062	19.657	125	157.095	5.712	704	570.608	20.685	379	344.797	12.76	PF00170,PF14144	PTHR22952,PTHR22952:SF180			K14431	GO:0043565,GO:0006355,GO:0003700,GO:0006351	AT5G65210.2	TGA1	bZIP transcription factor family protein
PGSC0003DMG400016973	1622	F-box and wd40 domain protein	137	169.771	6.33	991	1003.07	37.329	1229	1049.77	38.571	51	64.612	2.391	2749	2231.3	81.565	995	905.206	33.839	PF00400	PTHR22844,PTHR22844:SF199	KOG0645	2.7.11.7		GO:0005515	AT1G24530.1		Transducin/WD40 repeat-like superfamily protein
PGSC0003DMG400017167	1584	Protein kinase 1	11	13.631	0.522	55	55.67	2.128	96	82	3.094	3	3.801	0.145	58	47.077	1.767	143	130.095	4.997	PF07714	PTHR27001,PTHR27001:SF202	KOG1187	2.7.11.1		GO:0006468,GO:0004672	AT2G41970.1		Protein kinase superfamily protein
PGSC0003DMG400017214	791	MazG nucleotide pyrophosphohydrolase domain protein	16	19.827	1.778	100	101.218	9.032	99	84.563	7.321	14	17.737	1.562	135	109.576	9.373	76	69.141	6.237	PF03819	PTHR14552,PTHR14552:SF2		3.6.1.12			AT3G25400.1
PGSC0003DMG400017231	984	Transcription factor TSRF1	4	4.957	0.335	32	32.39	2.182	374	319.458	21.031	21	26.605	1.775	450	365.254	23.828	1202	1093.53	74.269	PF00847	PTHR31190,PTHR31190:SF25			K14516	GO:0006355,GO:0003700	AT3G23240.1	ATERF1,ERF1	ethylene response factor 1
PGSC0003DMG400017246	1487	1-aminocyclopropane-1-carboxylate oxidase homolog	18	22.306	0.99	115	115.39	5.095	119	101.646	4.431	41	51.943	2.284	385	312.496	13.515	314	284.754	12.652	PF14226,PF03171	PTHR10209,PTHR10209:SF156	KOG0143	1.14.11.20		GO:0055114,GO:0016491	AT1G06620.1		2-oxoglutarate (2OG) and Fe(II)-dependent oxygenase superfamily protein
PGSC0003DMG400017287	1104	Hypothetical protein	90	110.858	6.5	269	272.114	15.907	397	338.58	19.401	90	112.878	6.543	339	274.372	15.597	563	512.077	30.147		PTHR36751,PTHR36751:SF1					AT3G06780.1		glycine-rich protein
PGSC0003DMG400017732	1392	Zinc/iron transporter	141	174.727	7.995	742	751.035	33.924	562	479.187	21.3	104	131.757	5.809	733	594.959	26.073	218	198.327	8.848	PF02535	PTHR11040,PTHR11040:SF71	KOG1558		K14709	GO:0055085,GO:0046873,GO:0030001,GO:0016020	AT1G05300.1	ZIP5	zinc transporter 5 precursor
PGSC0003DMG400017958	2102	Nucleotide pyrophosphatase/phosphodiesterase	72	87.983	2.485	252	255.069	7.216	279	237.459	6.684	87	110.22	3.056	282	228.893	6.288	69	62.773	1.753	PF00149,PF16656	PTHR22953,PTHR22953:SF18		3.1.4.1		GO:0016787	AT5G50400.1	ATPAP27,PAP27	purple acid phosphatase 27
PGSC0003DMG400018006	1580	DNA binding protein	1	0.27	0.01	29	29.01	4.934	35	29.489	2.753	70	87.416	6.241	25	20.034	3.368	53	47.377	9.65	PF00628	PTHR10615,PTHR10615:SF100		2.1.1.43		GO:0005515	AT1G77250.1		RING/FYVE/PHD-type zinc finger family protein
PGSC0003DMG400018024	1969	Serine-threonine protein kinase, plant-type	46	57.003	1.74	157	157.9	4.885	263	224.646	6.788	44	55.743	1.706	420	340.904	10.356	1130	1028.02	31.516	PF00560,PF00069,PF13855	PTHR27000,PTHR27000:SF183		2.7.11.1		GO:0005515,GO:0006468,GO:0005524,GO:0004672	AT3G47570.1		Leucine-rich repeat protein kinase family protein
PGSC0003DMG400018125	811	Hypothetical protein	200	247.84	21.494	516	522.283	45.09	801	684.187	57.358	376	476.353	40.612	1525	1237.81	102.571	1265	1150.84	100.399		PTHR38224
PGSC0003DMG400018128	1716	Protein phosphatase 2c	101	124.488	4.354	395	399.515	13.948	385	328.765	11.341	214	271.106	9.417	582	472.396	16.218	203	184.669	6.474	PF05910	PTHR31972,PTHR31972:SF12					AT2G04220.1		Plant protein of unknown function (DUF868)
PGSC0003DMG400018452	2751	ATP binding protein	7	8.674	0.198	40	40.487	0.922	251	213.542	4.797	69	87.416	1.898	448	363.631	8.113	837	760.554	17.159	PF00954,PF01453,PF00069	PTHR27002,PTHR27002:SF142	KOG1187	2.7.11.1		GO:0048544,GO:0006468,GO:0005524,GO:0004672	AT1G34300.1		lectin protein kinase family protein
PGSC0003DMG400018483	2007	Binding protein	229	282.538	9.261	886	895.776	28.406	843	719.208	22.839	104	130.49	4.178	984	798.69	25.242	168	151.93	4.792	PF13371,PF13369	PTHR31350,PTHR31350:SF4					AT4G19160.2
PGSC0003DMG400018610	700	Elicitor resposible protein	2997	3713.89	393.495	8955	9064.04	955.034	10147	8667.23	881.184	2052	2599.67	269.763	8476	6879.77	689.674	3793	3450.7	368.264
PGSC0003DMG400018614	3022	Hypothetical protein	556	687.758	27.813	2116	2140.75	74.845	2688	2296	79.748	462	584.039	24.104	3588	2911.48	111.234	1356	1233.63	48.79	PF00564	PTHR31066				GO:0005515	AT3G26510.2		Octicosapeptide/Phox/Bem1p family protein
PGSC0003DMG400018623	791	Mads box protein	5	6.196	0.556	53	53.645	4.787	51	43.563	3.771	14	17.737	1.562	117	94.966	8.123	101	91.885	8.289	PF00319	PTHR11945,PTHR11945:SF176	KOG0014			GO:0046983,GO:0003677	AT3G18650.1	AGL103	AGAMOUS-like 103
PGSC0003DMG400018651	1953	Amino acid transporter	174	215.621	7.288	762	771.278	30.043	2894	2471.11	95.959	541	685.39	27.159	3720	3018.62	119.981	7406	6737.64	267.744	PF01490	PTHR22950,PTHR22950:SF233					AT1G47670.1		Transmembrane amino acid transporter family protein
PGSC0003DMG400018789	1385	Pepper esterase	34	42.133	1.885	269	272.275	12.153	928	792.666	34.844	10	12.669	0.562	38	30.844	1.348	42	38.21	1.715	PF12695	PTHR23024,PTHR23024:SF219	KOG1515	3.1.1.1			AT5G62180.1	AtCXE20,CXE20	carboxyesterase 20
PGSC0003DMG400018854	2120	Sugar transporter || Hexose carrier protein HEX6	338	418.85	12.92	1188	1202.47	36.98	1107	945.562	28.804	304	383.869	11.786	1153	935.863	28.512	592	538.574	16.623	PF00083	PTHR23500,PTHR23500:SF30				GO:0055085,GO:0022857,GO:0016021	AT5G26340.1	ATSTP13,MSS1,STP13	Major facilitator superfamily protein
PGSC0003DMG400018937	1335	S-adenosyl-methionine-sterol-C-methyltransferase homolog	253	313.518	14.645	684	692.329	32.26	1017	868.687	39.837	204	258.447	11.961	999	810.865	36.949	2552	2321.69	108.793	PF08241,PF08498	PTHR10108,PTHR10108:SF858	KOG1269	2.1.1.143,2.1.1.142	K08242	GO:0008168,GO:0008152,GO:0006694	AT1G20330.1	CVP1,FRL1,SMT2	sterol methyltransferase 2
PGSC0003DMG400019068	655	Sn-1 protein	29	35.937	4.33	199	200.411	23.862	188	160.583	18.377	109	138.092	16.089	453	367.689	41.205	157	142.832	17.078	PF00407	PTHR31907,PTHR31907:SF4				GO:0009607,GO:0006952	AT1G70890.1	MLP43	MLP-like protein 43
PGSC0003DMG400019344	2028	DNA binding protein	26	32.219	1.36	121	122.473	4.175	174	147.771	5.222	38	48.142	1.753	339	275.158	9.476	197	178.312	6.273	PF00447	PTHR10015,PTHR10015:SF160				GO:0043565,GO:0006355,GO:0005634,GO:0003700	AT3G22830.1	AT-HSFA6B,HSFA6B	heat shock transcription factor A6B
PGSC0003DMG400019435	970	Wound-induced protein WIN2 || Wound-induced protein WIN1	1597	1979	136.812	4737	4793.67	329.035	13325	11381.8	769.205	339	429.478	29.853	5087	4128.99	275.543	15871	14438.7	1017.35	PF00187,PF00967	PTHR22595,PTHR22595:SF62				GO:0008061,GO:0050832,GO:0042742	AT3G04720.1	HEL,PR-4,PR4	pathogenesis-related 4
PGSC0003DMG400019437	1019	Pathogen-and wound-inducible antifungal protein CBP20 || PR4-type protein	19	23.545	2.12	123	124.498	11.497	7387	6308.88	563.673	662	837.418	76.237	684	554.375	48.837	24782	22544.6	2102.6	PF00967	PTHR22595,PTHR22595:SF62				GO:0050832,GO:0042742	AT3G04720.1	HEL,PR-4,PR4	pathogenesis-related 4
PGSC0003DMG400019480	3950	RNA binding protein	170	210.597	4.948	612	618.933	11.798	763	651.019	14.011	219	276.934	8.413	649	526.499	14.75	430	390.477	8.631	PF05641,PF03735	PTHR31917,PTHR31917:SF5					AT4G32440.1		Plant Tudor-like RNA-binding protein
PGSC0003DMG400019627	3929	Disease resistance protein Gpa2	83	102.854	1.533	233	234.825	3.508	326	277.604	4.155	126	159.628	2.419	509	412.332	6.159	305	277.475	4.149	PF00931	PTHR23155,PTHR23155:SF643	KOG4658			GO:0043531	AT3G46530.1	RPP13	NB-ARC domain-containing disease resistance protein
PGSC0003DMG400019718	2098	Amine oxidase	993	1230.53	38.397	8449	8551.88	257.444	11159	9530.78	281.179	1221	1546.88	46.781	8907	7229.6	217.424	14213	12929.4	375.678	PF01593	PTHR10742,PTHR10742:SF228		1.5.3.16		GO:0055114,GO:0016491	AT3G59050.1	ATPAO3,PAO3	polyamine oxidase 3
PGSC0003DMG400019855	450	Uncharacterized mitochondrial protein	426	527.9	111.714	1257	1272.31	266.28	4423	3777.98	737.43	993	1258.03	255.481	2272	1844.13	350.417	2828	2572.79	552.401		PTHR37773					ATMG00030.1
PGSC0003DMG400020017	1352	Beta-1,3-glucanase || Glucan endo-1,3-beta-glucosidase, basic isoform 2 || Lichenase	573	710.063	32.678	2986	3022.36	138.809	9097	7769.49	351.419	146	184.967	8.435	4933	4004.01	179.888	21540	19595.2	904.98	PF00332	PTHR32227,PTHR32227:SF114		3.2.1.39		GO:0005975,GO:0004553	AT4G16260.1		Glycosyl hydrolase superfamily protein
PGSC0003DMG400020260	1545	Hypothetical protein	129	159.857	8.424	433	437.26	22.632	606	517.625	26.297	100	125.423	6.405	431	349.833	17.797	1250	1136.28	59.107		PTHR34280,PTHR34280:SF2					AT3G01860.1
PGSC0003DMG400020266	1822	Amino acid transporter	125	154.9	5.064	340	344.14	11.231	1596	1363.25	43.995	605	766.472	24.896	1787	1450.47	46.6	6901	6278.22	205.702	PF01490	PTHR22950,PTHR22950:SF235	KOG1303				AT5G40780.1	LHT1	lysine histidine transporter 1
PGSC0003DMG400020343	1773	AER	935	1158.65	39.058	3028	3064.87	103.132	4232	3614.83	120.242	581	736.066	24.647	5246	4258.05	140.984	5942	5405.76	182.644	PF02458	PTHR31896,PTHR31896:SF5		2.3.1.133		GO:0016747	AT5G01210.1		HXXXD-type acyl-transferase family protein
PGSC0003DMG400020433	1863	DNAJ heat shock N-terminal domain-containing protein	120	148.704	6.952	353	356.286	16.424	416	354.479	16.163	85	106.419	4.849	277	224.023	10.082	144	131.005	6.144	PF13370,PF00226	PTHR24078,PTHR24078:SF207	KOG0716				AT2G42750.1		DNAJ heat shock N-terminal domain-containing protein
PGSC0003DMG400020498	2938	Inositol-1,4,5-triphosphate-5-phosphatase	39	47.09	1.45	244	246.971	7.293	405	345.938	9.988	171	216.639	4.922	2295	1861.99	42.966	2026	1842.25	43.131	PF03372	PTHR11200,PTHR11200:SF107	KOG0565	3.1.3.56			AT4G18010.2	5PTASE2,AT5PTASE2,IP5PII	myo-inositol polyphosphate 5-phosphatase 2
PGSC0003DMG400020518	1852	Hypothetical protein	41	50.807	1.631	319	322.884	10.357	374	319.458	10.155	63	78.547	2.523	459	372.559	11.812	139	125.546	4.086	PF11744	PTHR31086,PTHR31086:SF2				GO:0015743	AT4G17970.1	ALMT12,ATALMT12	aluminum-activated, malate transporter 12
PGSC0003DMG400020618	1355	Tropinone reductase homolog	33	40.894	2.199	130	131.583	7.055	721	615	32.255	36	45.608	2.4	544	440.741	22.818	1362	1239.08	66.772	PF08659	PTHR24322,PTHR24322:SF410	KOG0725	1.1.1.206	K08081		AT5G06060.1		NAD(P)-binding Rossmann-fold superfamily protein
PGSC0003DMG400020666	539	Hypothetical protein	121	149.943	23.417	500	506.088	78.393	554	473.208	69.58	63	79.814	12.09	643	521.908	75.199	243	221.07	34.896	PF15697	PTHR33730,PTHR33730:SF4					AT5G20100.1
PGSC0003DMG400020723	910	Germin 4 || Germin 3	14	17.349	1.295	60	60.731	4.515	84	70.896	5.139	3	3.801	0.28	17	13.799	0.99	3	2.729	0.205	PF00190	PTHR31238,PTHR31238:SF20				GO:0045735	AT5G39110.1		RmlC-like cupins superfamily protein
PGSC0003DMG400020730	1603	DIV2B protein || MYB transcription factor	128	158.618	7.175	437	442.321	19.904	501	427.083	18.922	74	93.75	4.203	273	221.588	9.754	260	236.536	10.7	PF00249	PTHR24078,PTHR24078:SF261					AT3G11280.1		Duplicated homeodomain-like superfamily protein
PGSC0003DMG400020894	2863	Kinase || BRASSINOSTEROID INSENSITIVE 1-associated receptor kinase 1	218	269.939	11.276	751	760.142	29.217	779	665.229	23.065	123	155.464	5.229	1025	831.311	28.182	898	816.194	27.121	PF07714	PTHR27009,PTHR27009:SF19		3.1.4.46		GO:0006468,GO:0004672	AT5G38280.1	PR5K	PR5-like receptor kinase
PGSC0003DMG400021091	3092	K+ channel inward rectifying	288	356.891	6.551	854	864.398	15.87	921	786.687	14.353	286	362.332	6.623	1242	1008.1	18.352	1163	1057.13	19.437	PF00520,PF00027,PF11834	PTHR10217,PTHR10217:SF520				GO:0055085,GO:0016020,GO:0006811,GO:0005216	AT5G46240.1	KAT1	potassium channel in Arabidopsis thaliana 1
PGSC0003DMG400021389	813	Hypothetical protein	11	13.631	1.178	52	52.633	4.529	69	58.938	4.925	16	20.27	1.723	68	55.194	4.559	31	28.202	2.452	PF14364,PF05553	PTHR33098,PTHR33098:SF1					AT2G26110.1		Protein of unknown function (DUF761)
PGSC0003DMG400021555	2060	UDP-glucosyltransferase	97	120.203	3.522	271	274.299	8.312	387	330.562	9.319	90	114.02	3.397	235	190.744	6.887	362	328.422	9.382	PF00201	PTHR11926,PTHR11926:SF383		2.4.1.203		GO:0016758,GO:0008152	AT2G36970.1		UDP-Glycosyltransferase superfamily protein
PGSC0003DMG400021557	590	Hypothetical protein	54	66.917	9.086	164	165.997	22.38	281	240.021	30.921	35	44.341	5.863	388	314.93	39.856	94	85.517	11.72
PGSC0003DMG400021740	1369	Hypothetical protein	51	63.199	2.866	234	236.849	10.716	242	206.708	9.209	59	74.747	3.36	243	197.237	8.732	214	194.687	8.857		PTHR33541,PTHR33541:SF5					AT3G13980.1
PGSC0003DMG400021991	1749	GID1-like gibberellin receptor	170	209.426	7.478	502	507.1	18.084	732	625.249	22.064	173	217.906	7.733	1181	957.778	33.63	1307	1189.05	42.609	PF00135	PTHR23024,PTHR23024:SF98	KOG1515	3.1.1.1	K14493		AT3G63010.1	ATGID1B,GID1B	alpha/beta-Hydrolases superfamily protein
PGSC0003DMG400022094	828	Major latex	53	65.678	5.542	194	196.362	16.496	308	263.083	21.478	43	54.477	4.521	424	344.151	27.78	179	162.846	13.82	PF00407	PTHR31907,PTHR31907:SF4				GO:0009607,GO:0006952	AT1G70850.3	MLP34	MLP-like protein 34
PGSC0003DMG400022216	1687	SUI1 B protein	976	1208.22	114.25	2597	2627.61	247.835	3219	2748.71	251.918	764	966.642	89.683	3693	2997.52	270.074	2361	2147.93	204.801	PF01253	PTHR10388,PTHR10388:SF16	KOG1770		K03113	GO:0006413,GO:0003743	AT5G54940.1		Translation initiation factor SUI1 family protein
PGSC0003DMG400022342	1337	Suberization-associated anionic peroxidase	236	292.452	15.173	959	970.678	48.628	1124	960.083	47.406	325	410.475	20.623	1384	1122.55	53.537	864	786.028	39.554	PF00141	PTHR31388,PTHR31388:SF39		1.11.1.7	K00430	GO:0055114,GO:0020037,GO:0006979,GO:0004601	AT5G05340.1		Peroxidase superfamily protein
PGSC0003DMG400022449	507	Hypothetical protein	12	14.87	2.564	57	57.694	9.858	72	61.5	9.923	16	20.27	3.379	55	44.642	7.045	31	28.202	4.92		PTHR36615,PTHR36615:SF2
PGSC0003DMG400022467	837	N-acetyltransferase	14	17.349	1.443	60	60.731	5.03	104	88.833	7.153	16	20.27	1.659	153	124.186	9.889	59	53.676	4.491	PF13302	PTHR13256,PTHR13256:SF35				GO:0008080	AT3G22560.1		Acyl-CoA N-acyltransferases (NAT) superfamily protein
PGSC0003DMG400022555	756	Ubiquitin carrier protein	10	12.392	1.181	77	77.938	7.39	76	64.917	5.96	36	45.608	4.265	301	244.315	22.148	138	125.546	12.042	PF05773	PTHR24068	KOG0417	6.3.2.19	K06689	GO:0005515	AT1G64230.1	UBC28	ubiquitin-conjugating enzyme 28
PGSC0003DMG400023115	1126	Cyclase family protein	488	604.731	34.618	1353	1369.47	78.161	1854	1583.62	88.637	420	532.096	30.118	2383	1934.22	107.422	2385	2169.76	124.694	PF04199	PTHR31118		3.5.1.9		GO:0019441,GO:0004061	AT1G44542.1		Cyclase family protein
PGSC0003DMG400023193	892	Short chain alcohol dehydrogenase	15	17.349	1.378	60	60.731	4.632	115	98.229	7.565	66	83.615	6.326	68	55.194	4.06	102	92.795	7.183	PF13561	PTHR24322,PTHR24322:SF545	KOG0725	1.1.1.331,1.1.1.178,1.1.1.35,1.1.1.135			AT2G47140.1		NAD(P)-binding Rossmann-fold superfamily protein
PGSC0003DMG400023235	882	Sn-2 protein	303	375.478	29.625	1011	1023.32	79.647	1664	1421.33	107.694	366	463.684	37.615	1053	854.696	66.329	323	292.941	23.36	PF00407	PTHR31907,PTHR31907:SF5				GO:0009607,GO:0006952	AT5G28010.1		Polyketide cyclase/dehydrase and lipid transport superfamily protein
PGSC0003DMG400023386	3969	UDP-glucose:glucosyltransferase	9	11.153	0.157	49	48.808	0.686	71	60.556	0.847	23	27.872	0.391	67	53.903	0.753	32	28.882	0.407	PF00201	PTHR11926,PTHR11926:SF414				GO:0016758,GO:0008152	AT1G01420.1	UGT72B3	UDP-glucosyl transferase 72B3
PGSC0003DMG400023400	1603	DnaJ	9027	11186.3	422.753	24077	24370.2	919.172	30687	26211.8	975.931	14721	18650	699.569	56838	46134.1	1708.81	26486	24095.8	912.976	PF00684,PF00226,PF01556	PTHR24078,PTHR24078:SF237	KOG0712		K09503	GO:0051082,GO:0031072	AT5G22060.1	ATJ2,J2	DNAJ homologue 2
PGSC0003DMG400023488	1702	UDP-glucose:glucosyltransferase	4	4.957	0.414	75	75.69	4.695	77	65.615	3.515	11	12.669	1.04	40	31.739	2.291	49	44.392	3.003
PGSC0003DMG400023659	1511	Thioredoxin	81	100.375	5.274	290	292.519	14.693	356	304.083	16.145	19	22.804	1.226	80	64.122	3.503	40	35.48	2.133		PTHR10438,PTHR10438:SF245				GO:0045454,GO:0015035,GO:0006662	AT1G08570.2	ACHT4	atypical CYS HIS rich thioredoxin 4
PGSC0003DMG400023769	9851	Potassium channel || Potassium channel NKT2	848	1050.23	17.02	3539	3581.59	63.657	3514	3000.82	45.498	861	1089.93	15.537	4753	3857.79	56.205	3122	2839.68	43.321	PF07885,PF00027,PF11834,PF12796	PTHR10217,PTHR10217:SF493	KOG0498				AT4G22200.1	AKT2,AKT2/3,AKT3,KT2/3	potassium transport 2/3
PGSC0003DMG400023971	963	Calcium/calmodulin protein kinase	11	13.631	0.947	69	69.84	4.834	116	99.083	6.698	10	12.669	0.868	93	75.486	5.055	171	155.568	10.858		PTHR34120		2.7.11.17			AT3G52710.1
PGSC0003DMG400024136	3036	Hypothetical protein	0	0	0	48	47.585	0.889	53	45.136	1.105	2	2.534	0.144	23	18.581	0.861	24	21.602	0.931
PGSC0003DMG400024230	2933	GTP binding protein	40	48.979	1.343	185	186.918	5.211	148	126.144	3.476	100	126.655	3.957	212	171.976	4.136	87	78.45	2.04							AT3G57180.1	BPG2	P-loop containing nucleoside triphosphate hydrolases superfamily protein
PGSC0003DMG400024409	2002	Zinc transporter protein || ZIP transporter	12	14.87	0.438	68	68.828	2.383	77	64.917	2.363	10	11.402	0.443	89	71.428	3.074	11	9.098	0.364	PF02535	PTHR11040,PTHR11040:SF71				GO:0055085,GO:0046873,GO:0030001,GO:0016020	AT1G05300.1	ZIP5	zinc transporter 5 precursor
PGSC0003DMG400024586	3262	PBng143	129	159.857	3.41	346	350.212	7.491	443	378.394	7.944	131	165.963	3.505	542	439.929	9.203	317	288.392	6.064	PF04134	PTHR34290,PTHR34290:SF2					AT5G50100.1		Putative thiol-disulphide oxidoreductase DCC
PGSC0003DMG400024593	2002	Glycosyltransferase UGT90A7	51	62.572	1.967	165	166.314	5.23	456	389.156	12.81	33	40.541	1.397	174	140.484	4.701	791	719.275	24.92	PF00201	PTHR11926,PTHR11926:SF250				GO:0016758,GO:0008152	AT5G14860.1		UDP-Glycosyltransferase superfamily protein
PGSC0003DMG400024630	1959	Cytochrome P450	24	29.741	0.897	103	104.254	3.138	140	119.583	3.562	27	34.206	1.025	66	53.571	1.589	15	13.646	0.412	PF00067	PTHR24298,PTHR24298:SF112	KOG0156			GO:0055114,GO:0020037,GO:0016705,GO:0005506	AT1G74110.1	CYP78A10	cytochrome P450, family 78, subfamily A, polypeptide 10
PGSC0003DMG400024771	1216	Hypothetical protein	234	289.974	18.228	861	870.472	54.386	1014	866.124	52.428	272	343.329	21.288	1864	1512.15	90.744	1968	1790.4	110.312	PF12937,PF14299	PTHR32278,PTHR32278:SF2				GO:0005515	AT1G09155.1	AtPP2-B15,PP2-B15	phloem protein 2-B15
PGSC0003DMG400024967	1367	Peroxidase	126	156.139	7.093	666	673.102	30.643	2225	1899.67	85.04	113	141.893	6.429	5235	4249.13	188.664	8275	7527.31	343.896	PF00141	PTHR31517,PTHR31517:SF3		1.11.1.7	K00430	GO:0055114,GO:0020037,GO:0006979,GO:0004601	AT5G67400.1	RHS19	root hair specific 19
PGSC0003DMG400025042	1087	CT099 || Copper ion binding protein	54	66.917	4.359	235	237.862	16.739	278	237.458	15.466	106	134.291	8.987	703	570.609	34.218	716	651.384	45.419	PF02298	PTHR33021,PTHR33021:SF45				GO:0009055	AT5G53870.1	AtENODL1,ENODL1	early nodulin-like protein 1
PGSC0003DMG400025070	907	Zinc finger protein	0	0	0	39	39.366	2.939	25	21.111	1.537	0	0	0	1	0.036	0.003	19	17.124	1.29		PTHR22883,PTHR22883:SF41		2.3.1.225			AT4G24630.1		DHHC-type zinc finger family protein
PGSC0003DMG400025127	2657	Pho1	51	61.96	1.583	325	328.957	7.222	438	374.125	8.054	76	96.284	2.101	681	552.751	11.857	178	161.936	3.532	PF05180,PF03105,PF03124	PTHR10783,PTHR10783:SF35	KOG1162			GO:0008270,GO:0016021	AT1G68740.1	PHO1;H1	EXS (ERD1/XPR1/SYG1) family protein
PGSC0003DMG400025194	1596	Dehydration-responsive protein RD22	162	200.751	8.074	444	449.406	17.65	994	849.041	33.077	51	64.612	2.52	293	237.821	9.196	157	141.922	5.617	PF03181	PTHR31236,PTHR31236:SF4					AT1G49320.1	ATUSPL1,USPL1	unknown seed protein like 1
PGSC0003DMG400025721	1152	Hypothetical protein	470	582.425	35.871	1977	2000.06	123.206	1530	1306.02	78.713	416	527.028	32.181	1090	883.915	52.91	348	315.685	19.689	PF04570	PTHR33059,PTHR33059:SF6					AT1G74940.1		Protein of unknown function (DUF581)
PGSC0003DMG400025891	772	Hypothetical protein	12	14.87	1.377	62	62.755	5.785	75	64.063	5.723	22	27.872	2.535	45	36.525	3.223	75	68.232	6.36		PTHR31722					AT4G34419.1
PGSC0003DMG400026035	975	AP2/ERF domain-containing transcription factor	11	13.631	0.932	64	64.779	4.414	83	70.896	4.72	9	11.402	0.769	30	24.35	1.606	24	21.834	1.5	PF00847	PTHR31985,PTHR31985:SF11				GO:0006355,GO:0003700	AT2G44940.1		Integrase-type DNA-binding superfamily protein
PGSC0003DMG400026225	3523	Monoxygenase	260	322.192	6.298	656	663.988	13.267	1705	1455.5	28.76	185	234.376	4.133	687	557.621	9.935	4677	4254.92	79.19	PF01494	PTHR13789,PTHR13789:SF224	KOG2614			GO:0071949	AT2G35660.1	CTF2A	FAD/NAD(P)-binding oxidoreductase family protein
PGSC0003DMG400026264	1316	Homeobox-leucine zipper protein	112	138.791	6.593	363	367.42	18.628	425	363.021	17.313	106	134.291	6.536	185	150.16	6.956	201	182.861	8.715	PF02183,PF00046,PF04618	PTHR24326,PTHR24326:SF140	KOG0483		K09338	GO:0043565,GO:0006355,GO:0003700,GO:0003677,GO:0005634	AT4G16780.1	ATHB-2,ATHB2,HAT4,HB-2	homeobox protein 2
PGSC0003DMG400026363	1003	Hypothetical protein	3	3.718	0.245	50	50.609	3.329	70	59.792	3.846	1	1.267	0.083	27	21.915	1.397	77	70.051	4.645		PTHR34207					AT3G52740.1
PGSC0003DMG400026575	1229	Class III peroxidase	13	16.11	0.83	78	78.95	4.056	138	117.875	5.951	12	15.203	0.835	131	106.33	5.33	153	139.192	7.196	PF00141	PTHR31388,PTHR31388:SF29		1.11.1.7	K00430	GO:0055114,GO:0020037,GO:0006979,GO:0004601	AT5G05340.1		Peroxidase superfamily protein
PGSC0003DMG400026616	811	Wound-induced protein	5	6.196	0.537	239	241.91	20.885	208	177.667	14.895	8	10.135	0.864	484	392.851	32.554	67	60.954	5.318	PF07107	PTHR33703					AT5G01740.1		Nuclear transport factor 2 (NTF2) family protein
PGSC0003DMG400026644	1393	DNA binding protein	30	37.176	1.652	111	112.352	4.981	124	105.917	4.625	30	38.007	1.674	111	90.096	3.911	65	59.134	2.636	PF00249	PTHR31314					AT2G38300.1		myb-like HTH transcriptional regulator family protein
PGSC0003DMG400026779	2045	Twin lov protein || PAS/LOV protein A	197	244.123	7.915	1153	1167.04	37.603	692	591.083	19.222	226	285.051	9.305	1986	1611.18	50.265	360	326.602	10.491	PF13426	PTHR24351		2.7.11.1			AT2G02710.1	PLP,PLPA,PLPB,PLPC	PAS/LOV protein B
PGSC0003DMG400027118	813	Abscisic acid receptor PYL4	0	0	0	31	31.378	2.7	63	53.813	4.497	0	0	0	78	63.311	5.23	29	26.383	2.294	PF10604	PTHR31213,PTHR31213:SF3			K14496		AT2G40330.1	PYL6,RCAR9	PYR1-like 6
PGSC0003DMG400027127	1690	Anthocyanin 5-aromatic acyltransferase	31	38.415	1.367	153	154.863	5.501	177	151.187	5.305	14	17.737	0.627	87	70.616	2.466	131	119.178	4.251	PF02458	PTHR31896,PTHR31896:SF11		2.3.1.133		GO:0016747	AT2G39980.1		HXXXD-type acyl-transferase family protein
PGSC0003DMG400027180	1723	Anthocyanin 5-aromatic acyltransferase	9	10.82	0.377	127	128.544	4.467	438	373.43	12.851	18	22.417	0.775	149	120.71	4.125	643	584.517	20.459	PF02458	PTHR31896,PTHR31896:SF11		2.3.1.99,2.3.1.133		GO:0016747	AT2G39980.1		HXXXD-type acyl-transferase family protein
PGSC0003DMG400027206	1148	Gibberellin 2-oxidase	4	3.72	0.208	31	30.368	1.693	36	30.75	1.682	7	8.868	0.49	19	14.61	0.793	10	8.194	0.46	PF14226,PF03171	PTHR10209,PTHR10209:SF160	KOG0143	1.14.11.13	K04125	GO:0055114,GO:0016491	AT1G02400.1	ATGA2OX4,ATGA2OX6,DTA1,GA2OX6	gibberellin 2-oxidase 6
PGSC0003DMG400027519	4280	Hypothetical protein	214	265.189	4.828	585	592.124	10.976	978	835.375	15.309	222	279.984	5.124	1034	838.461	15.194	1409	1281.85	23.509	PF04576	PTHR31448,PTHR31448:SF10					AT1G08800.2		Protein of unknown function, DUF593
PGSC0003DMG400027750	2252	Hsc70	14	17.349	0.448	129	130.571	3.37	614	524.458	13.416	34	43.075	1.108	287	232.951	5.938	1375	1250.91	32.385	PF00012	PTHR19375,PTHR19375:SF232			K03283		AT5G02500.1	AT-HSC70-1,HSC70,HSC70-1,HSP70-1	heat shock cognate protein 70-1
PGSC0003DMG400027959	2256	DNA binding protein	16	19.827	0.535	68	68.828	2.486	87	74.313	2.593	29	36.74	1.079	94	76.298	2.413	33	30.022	0.863	PF00010	PTHR13935,PTHR13935:SF54				GO:0046983,GO:0003677	AT5G51780.1		basic helix-loop-helix (bHLH) DNA-binding superfamily protein
PGSC0003DMG400028068	1109	Hypothetical protein	375	464.701	27.099	1098	1111.37	64.611	1657	1415.35	80.666	329	416.809	24.028	3188	2587.62	146.314	960	873.364	51.133		PTHR33270,PTHR33270:SF3					AT2G27830.1
PGSC0003DMG400028186	673	SAUR family protein	25	30.98	3.47	401	405.883	45.189	242	206.708	22.163	10	12.669	1.388	78	63.311	6.688	21	19.105	2.156	PF02519	PTHR31374,PTHR31374:SF19			K14488	GO:0009733	AT3G09870.1		SAUR-like auxin-responsive protein family
PGSC0003DMG400028479	1992	CBL-interacting protein kinase 16	63	78.07	2.41	329	333.006	10.215	242	206.708	6.286	80	101.352	3.109	217	176.134	5.348	148	134.644	4.165	PF03822	PTHR24347,PTHR24347:SF215		2.7.11.1		GO:0007165	AT5G45820.1	CIPK20,PKS18,SnRK3.6	CBL-interacting protein kinase 20
PGSC0003DMG400028491	1755	CBL-interacting protein kinase 6	28	34.698	1.183	121	122.473	4.169	195	166.562	5.604	66	83.615	2.832	511	414.767	13.889	252	229.258	7.836	PF14531,PF03822	PTHR24347,PTHR24347:SF186	KOG0583	2.7.11.1		GO:0007165	AT5G25110.1	CIPK25,SnRK3.25	CBL-interacting protein kinase 25
PGSC0003DMG400028579	1775	Hypothetical protein	147	182.163	6.133	398	402.846	13.539	646	551.791	18.332	191	241.977	8.092	770	624.991	20.668	1179	1072.6	36.194	PF13639	PTHR14155			K10664	GO:0008270,GO:0005515	AT5G27420.1	ATL31,CNI1	carbon/nitrogen insensitive 1
PGSC0003DMG400028710	1863	Ammonium transporter 1 member 2	98	121.442	3.872	410	414.992	13.21	675	576.562	18.154	92	116.554	3.693	430	349.021	10.941	179	162.846	5.204	PF00909	PTHR11730,PTHR11730:SF39			K03320	GO:0016020,GO:0015696,GO:0008519,GO:0072488	AT1G64780.1	AMT1;2,ATAMT1;2	ammonium transporter 1;2
PGSC0003DMG400028750	843	Hypothetical protein	9	11.152	1.077	100	101.218	9.542	105	89.621	8.268	10	12.669	1.105	368	298.48	26.784	84	76.419	7.489	PF14009	PTHR33052,PTHR33052:SF2					AT1G06980.1
PGSC0003DMG400028789	1034	Hypothetical protein	4	4.957	0.315	34	34.414	2.18	44	37.583	2.33	14	17.737	1.113	101	81.979	5.038	113	102.802	6.562		PTHR34539,PTHR34539:SF2					AT1G13360.1
PGSC0003DMG400028810	2297	Amine oxidase	641	794.329	22.909	2055	2080.02	57.021	2504	2138.84	62.311	680	860.222	24.077	2014	1633.9	48.096	2794	2541.86	70.649	PF01593	PTHR10742,PTHR10742:SF238		1.5.3.16,1.5.3.17		GO:0055114,GO:0016491	AT2G43020.1	ATPAO2,PAO2	polyamine oxidase 2
PGSC0003DMG400028967	944	CHP-rich zinc finger protein	0	0	0	19	19.231	1.365	59	50.396	3.491	2	2.534	0.178	75	60.876	4.177	159	144.651	10.355	PF07649	PTHR13871,PTHR13871:SF50				GO:0055114,GO:0047134	AT2G44380.1		Cysteine/Histidine-rich C1 domain family protein
PGSC0003DMG400029107	1493	Small rubber particle protein	276	342.02	14.025	719	727.755	29.778	1178	1006.21	40.598	343	434.545	17.675	1163	943.98	37.874	1426	1297.31	53.346	PF05755	PTHR33732,PTHR33732:SF2					AT1G67360.2		Rubber elongation factor protein (REF)
PGSC0003DMG400029128	1779	Kinase	137	169.771	8.177	485	490.906	22.903	438	373.271	18.448	115	145.693	5.744	926	751.613	29.543	416	378.458	17.859	PF00069	PTHR27009,PTHR27009:SF19		3.1.4.46		GO:0006468,GO:0005524,GO:0004672	AT1G66910.1		Protein kinase superfamily protein
PGSC0003DMG400029129	711	Stress-induced receptor-like kinase	45	55.42	5.746	167	168.185	17.342	164	139.614	13.901	22	27.644	2.808	194	157.094	15.428	177	160.414	16.749	PF13947	PTHR33138,PTHR33138:SF7				GO:0030247	AT5G38260.1		Protein kinase superfamily protein
PGSC0003DMG400029169	4385	Hypothetical protein	220	272.322	3.451	619	626.537	7.935	1448	1236.83	15.597	756	956.507	12.092	2026	1644.46	20.7	2495	2269.84	28.792	PF05212	PTHR31210,PTHR31210:SF8					AT4G12840.1		Protein of unknown function (DUF707)
PGSC0003DMG400029207	1624	WRKY transcription factor 6	81	100.375	5.798	235	237.861	14.406	2027	1731.39	105.432	362	458.616	28.225	6673	5415.51	326.006	5778	5256.56	326.488	PF03106	PTHR31282,PTHR31282:SF17				GO:0043565,GO:0006355,GO:0003700	AT3G56400.1	ATWRKY70,WRKY70	WRKY DNA-binding protein 70
PGSC0003DMG400029213	1801	Cytochrome P450	6	6.196	0.296	60	59.72	2.181	193	164.002	5.58	35	43.075	1.876	180	146.102	5.789	695	631.374	21.388	PF00067	PTHR24298,PTHR24298:SF157	KOG0156			GO:0055114,GO:0020037,GO:0016705,GO:0005506	AT4G36220.1	CYP84A1,FAH1	ferulic acid 5-hydroxylase 1
PGSC0003DMG400029214	1180	BURP domain-containing protein	447	553.923	29.963	1699	1719.69	92.759	1427	1218.9	64.545	407	515.627	27.595	3724	3022.68	158.889	1512	1375.55	74.683	PF03181	PTHR31236,PTHR31236:SF9					AT5G25610.1	ATRD22,RD22	BURP domain-containing protein
PGSC0003DMG400029246	1119	Hypothetical protein	1	0.035	0.002	94	95.14	5.471	63	53.792	3.033	16	19.436	1.108	71	57.627	3.224	30	27.29	1.58		PTHR32080,PTHR32080:SF10
PGSC0003DMG400029300	573	Bet v I allergen family protein	11	13.631	1.935	64	64.779	9.128	67	57.229	7.69	10	12.669	1.749	65	52.759	6.959	52	47.307	6.781	PF10604	PTHR31213,PTHR31213:SF7			K14496		AT2G26040.1	PYL2,RCAR14	PYR1-like 2
PGSC0003DMG400029313	5532	R2 protein	389	482.05	11.416	1412	1429.19	34.344	1485	1267.58	28.63	521	660.053	14.808	1818	1474.82	34.487	4604	4188.51	90.138	PF13401	PTHR23155,PTHR23155:SF402					AT3G07040.1	RPM1,RPS3	NB-ARC domain-containing disease resistance protein
PGSC0003DMG400029327	1260	Transcription factor	109	135.073	6.885	645	652.854	36.432	600	511.646	26.78	61	77.281	4.015	299	241.88	13.301	107	97.344	5.649	PF00505,PF01388	PTHR13711,PTHR13711:SF202	KOG0381			GO:0003677	AT1G76110.1		HMG (high mobility group) box protein with ARID/BRIGHT DNA-binding domain
PGSC0003DMG400029434	1755	Hypothetical protein	48	59.482	2.028	277	280.373	9.543	213	181.937	6.121	26	32.939	1.116	243	197.237	6.605	26	23.654	0.808
PGSC0003DMG400029547	1719	Beta-1,3-galactosyltransferase sqv-2 || Avr9 elicitor response protein	60	74.352	3.74	171	172.07	8.205	356	303.229	14.838	260	329.393	12.487	682	553.564	21.921	1158	1052.59	47.362	PF13334,PF01762	PTHR11214,PTHR11214:SF74	KOG2288	2.4.1.134		GO:0016020,GO:0008378,GO:0006486	AT1G77810.2		Galactosyltransferase family protein
PGSC0003DMG400029570	1324	Pentatricopeptide repeat-containing protein	58	71.874	3.39	174	176.119	8.286	398	339.958	15.74	110	139.359	6.512	1116	905.831	41.67	1135	1032.57	48.86	PF03407	PTHR24015,PTHR24015:SF419					AT1G14590.1		Nucleotide-diphospho-sugar transferase family protein
PGSC0003DMG400029754	497	Hypothetical protein	30	37.176	37.172	145	146.766	111.195	401	342.521	238.86	28	34.207	41.391	473	383.923	274.936	756	687.774	1010.13		PTHR37183					AT1G25275.1
PGSC0003DMG400029830	1265	Glucan endo-1,3-beta-D-glucosidase	48	59.482	2.961	227	229.764	11.408	11740	10027.9	489.485	689	872.891	43.026	870	706.158	34.236	28987	26371.1	1317.17	PF00332	PTHR32227,PTHR32227:SF49		3.2.1.39		GO:0005975,GO:0004553	AT3G57270.1	BG1	beta-1,3-glucanase 1
PGSC0003DMG400029915	3189	Acyl-CoA synthetase	24	28.502	0.604	109	109.315	2.31	1756	1499.92	34.743	184	233.109	5.569	1018	826.286	18.935	11124	10119.2	240.604	PF13193,PF00501	PTHR24095,PTHR24095:SF171	KOG1176	6.2.1.8		GO:0008152,GO:0003824	AT3G48990.1		AMP-dependent synthetase and ligase family protein
PGSC0003DMG400029920	1223	Hypothetical protein	162	200.751	10.403	607	614.391	31.752	1161	991.687	50.352	83	105.152	5.394	1121	909.889	45.874	1031	937.957	48.778	PF00168	PTHR32246,PTHR32246:SF17				GO:0005515	AT5G23950.1		Calcium-dependent lipid-binding (CaLB domain) family protein
PGSC0003DMG400029994	4231	Hypothetical protein	178	220.578	3.652	566	571.879	9.682	620	528.728	9.017	192	243.244	4.142	967	784.08	13.334	350	317.504	5.308		PTHR36893
PGSC0003DMG400030006	946	PAR-1b protein	2	2.478	0.176	44	44.536	3.152	1120	956.666	66.099	99	125.423	8.787	243	197.237	13.498	4897	4455.07	318.049	PF06521	PTHR33649,PTHR33649:SF2					AT5G52390.1		PAR1 protein
PGSC0003DMG400030231	774	SAUR family protein	24	29.741	2.745	89	90.084	8.275	162	138.375	12.321	51	64.612	5.857	229	185.874	16.347	446	405.751	37.691	PF02519	PTHR31374,PTHR31374:SF15			K14488	GO:0009733	AT2G46690.1		SAUR-like auxin-responsive protein family
PGSC0003DMG400030274	1278	ATP binding protein	38	45.85	2.255	129	130.571	6.405	144	122.146	5.892	45	55.743	2.715	191	154.219	7.389	125	113.72	5.611	PF00069	PTHR13902,PTHR13902:SF60	KOG0198	2.7.11.1	K08867	GO:0006468,GO:0005524,GO:0004672	AT5G55560.1		Protein kinase superfamily protein
PGSC0003DMG400030405	2198	Heat shock cognate 70 kDa protein 1	96	118.963	3.157	256	259.117	6.868	863	737.146	19.361	168	212.838	5.619	898	728.885	19.074	3152	2867.55	76.247	PF00012	PTHR19375,PTHR19375:SF174			K03283		AT5G02500.1	AT-HSC70-1,HSC70,HSC70-1,HSP70-1	heat shock cognate protein 70-1
PGSC0003DMG400030463	2954	NN mitogen-activated protein kinase	207	256.514	6.382	561	567.831	14.006	668	569.729	14.043	295	373.734	9.244	1743	1413.94	34.472	898	816.959	20.361	PF00069	PTHR13902,PTHR13902:SF49		2.7.11.1	K08867	GO:0006468,GO:0005524,GO:0004672	AT5G58350.1	WNK4,ZIK2	with no lysine (K) kinase 4
PGSC0003DMG400030483	543	Hypothetical protein	41	50.807	7.842	429	434.224	66.484	274	234.042	34.036	7	8.868	1.328	138	112.011	15.966	35	31.841	4.967
PGSC0003DMG400030535	2100	Wall-associated kinase	43	53.286	1.628	160	160.936	4.914	219	186.21	5.507	8	8.87	0.246	110	88.473	2.652	196	178.312	5.242	PF14380,PF00069	PTHR27005,PTHR27005:SF28	KOG1187	2.7.11.1		GO:0006468,GO:0005524,GO:0004672	AT1G25390.1		Protein kinase superfamily protein
PGSC0003DMG400030541	1105	Nutrient reservoir	295	365.565	21.412	1090	1103.27	64.423	1139	972.895	55.688	361	457.349	26.48	2401	1948.83	110.666	2196	1997.82	117.486		PTHR35094,PTHR35094:SF1					AT1G23040.1		hydroxyproline-rich glycoprotein family protein
PGSC0003DMG400030636	1600	Loganic acid methyltransferase	204	251.558	10.956	711	719.658	31.304	719	614.146	26.347	147	184.967	7.977	522	422.884	18.067	178	161.936	7.129	PF03492	PTHR31009,PTHR31009:SF14		2.1.1.50		GO:0008168	AT1G15125.1		S-adenosyl-L-methionine-dependent methyltransferases superfamily protein
PGSC0003DMG400030821	1528	Ring finger protein	4	4.957	0.198	32	32.39	1.29	57	48.688	1.913	10	12.669	0.502	65	52.759	2.062	125	113.719	4.553	PF13639	PTHR14155,PTHR14155:SF174	KOG1493			GO:0008270,GO:0005515	AT1G72220.1		RING/U-box superfamily protein
PGSC0003DMG400030928	2880	EIN3-binding F-box protein 1	336	416.372	8.512	1539	1557.74	31.743	1819	1552.87	31.423	358	453.548	9.18	3767	3057.58	61.582	2341	2129.73	43.347	PF00646,PF13516	PTHR24006,PTHR24006:SF501	KOG1947		K14515	GO:0005515	AT2G25490.1	EBF1,FBL6	EIN3-binding F box protein 1
PGSC0003DMG400031090	1770	PsPK3 protein	48	59.482	2.009	161	162.96	5.494	176	150.333	5.01	71	89.95	3.018	118	95.778	3.177	159	144.651	4.897	PF07714	PTHR24351,PTHR24351:SF82		2.7.11.1		GO:0006468,GO:0004672	AT3G14370.1	WAG2	Protein kinase superfamily protein
PGSC0003DMG400031120	896	Glycine-rich protein A3	176	216.86	18.53	473	478.759	37.645	636	543.249	41.549	167	211.572	16.144	802	650.964	48.421	725	659.572	51.365		PTHR31248,PTHR31248:SF3
PGSC0003DMG400031163	1641	Glutamyl-tRNA reductase	8	9.914	0.365	72	72.877	2.676	60	51.25	1.859	23	29.139	1.064	105	85.226	3.075	37	33.661	1.242	PF03807,PF00745,PF05201	PTHR13812,PTHR13812:SF20		1.2.1.70	K02492	GO:0055114,GO:0050661,GO:0033014,GO:0008883	AT1G58290.1	HEMA1	Glutamyl-tRNA reductase family protein
PGSC0003DMG400031360	1690	UDP-glucoronosyl/UDP-glucosyl transferase family protein	176	218.099	7.761	609	615.406	21.861	728	620.98	21.793	40	50.676	1.791	313	254.055	8.871	114	103.71	3.7	PF00201	PTHR11926,PTHR11926:SF202		2.4.1.203		GO:0016758,GO:0008152	AT2G36970.1		UDP-Glycosyltransferase superfamily protein
PGSC0003DMG400031777	765	Homeobox-leucine zipper protein ATHB-52	18	22.306	2.092	228	230.776	21.535	341	291.271	26.333	29	36.74	3.382	779	632.296	56.451	630	573.145	54.093	PF00046	PTHR24326,PTHR24326:SF257	KOG0483			GO:0003677	AT5G53980.1	ATHB52,HB52	homeobox protein 52
PGSC0003DMG400031788	634	Protein induced upon tuberization	1146	1420.12	377.702	8439	8541.76	1976.47	5242	4477.54	1036.68	1314	1663.43	276.618	6286	5102.19	818.466	1774	1613.91	265.063	PF03242	PTHR33509,PTHR33509:SF5				GO:0006950	AT4G02380.1	AtLEA5,SAG21	senescence-associated gene 21
PGSC0003DMG400032107	3597	Pyruvate, phosphate dikinase, chloroplastic	172	213.143	3.779	938	949.421	16.819	2421	2067.08	36.61	241	305.321	5.464	3090	2508.08	44.247	1850	1683.05	29.872	PF00391,PF02896	PTHR22931,PTHR22931:SF9		2.7.9.1		GO:0016772,GO:0016310,GO:0050242,GO:0006090	AT4G15530.5	PPDK	pyruvate orthophosphate dikinase
PGSC0003DMG400032147	1133	Peroxidase	230	285.016	16.194	876	886.666	50.227	1353	1155.69	64.211	180	228.041	12.812	1526	1238.62	68.289	1609	1463.8	83.49	PF00141	PTHR31388,PTHR31388:SF28		1.11.1.7	K00430	GO:0055114,GO:0020037,GO:0006979,GO:0004601	AT5G06720.1	ATPA2,PA2	peroxidase 2
PGSC0003DMG400032199	1235	Peroxidase	16	19.827	1.016	589	596.172	30.454	4165	3557.6	178.584	56	70.946	3.597	1611	1307.61	65.183	7724	7026.94	361.182	PF00141	PTHR31388,PTHR31388:SF28		1.11.1.7	K00430	GO:0055114,GO:0020037,GO:0006979,GO:0004601	AT5G06720.1	ATPA2,PA2	peroxidase 2
PGSC0003DMG400032778	1972	Hypothetical protein	32	38.415	1.256	113	114.376	4.451	250	212.687	6.894	81	102.619	3.464	191	155.03	6.216	629	571.326	19.25		PTHR31182,PTHR31182:SF5					AT3G11760.1
PGSC0003DMG400033035	2381	Hypersensitive-induced response protein 1 || Hypersensitive-induced reaction protein	697	863.724	41.208	1763	1784.47	85.264	2709	2313.09	108.999	1047	1326.44	62.636	7469	6061.6	281.148	6486	5900.67	281.903	PF01145	PTHR10264,PTHR10264:SF92				GO:0016020	AT5G62740.1	ATHIR1,HIR1	SPFH/Band 7/PHB domain-containing membrane-associated protein family
PGSC0003DMG400033634	1384	Fatty acid desaturase	3	3.718	0.166	41	41.499	1.854	505	431.354	18.977	161	203.97	9.053	209	169.64	7.418	3485	3170.49	142.403	PF11960,PF00487	PTHR32100,PTHR32100:SF13		1.3.1.35	K10256	GO:0055114,GO:0016717,GO:0006629	AT3G12120.1	FAD2	fatty acid desaturase 2
PGSC0003DMG400033642	1166	Short-chain type alcohol dehydrogenase || 2,4-dienoyl-CoA reductase	54	66.917	3.977	232	234.825	13.889	1499	1280.39	74.288	221	279.984	16.38	921	746.742	42.747	4036	3670.86	218.348	PF13561	PTHR24322,PTHR24322:SF391	KOG0725	1.1.1.100			AT3G46170.1		NAD(P)-binding Rossmann-fold superfamily protein
PGSC0003DMG400033688	1407	Tartrate-resistant acid phosphatase type 5	8	8.674	0.381	45	44.536	1.952	176	150.334	6.511	7	8.868	0.386	102	82.791	3.553	203	184.68	8.136	PF00149	PTHR10161,PTHR10161:SF14	KOG2679	3.1.3.2,1.11.1.7	K14379	GO:0016787	AT3G17790.1	ATACP5,ATPAP17,PAP17	purple acid phosphatase 17
PGSC0003DMG400033693	1385	UPA16	10386	12870.4	575.827	35160	35588.1	1588.49	40512	34604	1521.14	5906	7482.29	331.812	27763	22534.6	984.547	12516	11386.5	510.993	PF03083	PTHR10791,PTHR10791:SF33	KOG1623		K15382		AT3G48740.1		Nodulin MtN3 family protein
PGSC0003DMG400033696	1375	MAPKK	796	986.405	44.508	2685	2717.69	122.335	2686	2294.29	101.696	607	769.006	34.39	4827	3917.96	172.599	1858	1690.32	76.504	PF00069	PTHR24361,PTHR24361:SF344	KOG0581	2.7.12.2		GO:0006468,GO:0005524,GO:0004672	AT1G73500.1	ATMKK9,MKK9	MAP kinase kinase 9
PGSC0003DMG400033874	2136	Malic enzyme	9773	12110.7	331.727	28957	29309.6	801.669	33547	28654.7	776.429	6329	8018.18	218.439	37254	30238.2	816.249	53606	48768.3	1338.32	PF00390,PF03949	PTHR23406,PTHR23406:SF11		1.1.1.40	K00029	GO:0055114,GO:0004471,GO:0051287	AT5G25880.1	ATNADP-ME3,NADP-ME3	NADP-malic enzyme 3
PGSC0003DMG400033879	3262	Jasmonic acid-amino acid-conjugating enzyme	1058	1311.08	37.869	3422	3463.67	101.591	3516	3002.4	86.955	877	1111.07	32.604	4170	3383.87	98.097	3187	2899.39	85.328	PF03321	PTHR31901,PTHR31901:SF3			K14506	GO:0080123,GO:0009864,GO:0009694,GO:0009611	AT2G46370.4	FIN219,JAR1	Auxin-responsive GH3 family protein
PGSC0003DMG400036004	1116	Fatty acid desaturase	0	0	0	160	161.948	9.343	1906	1628.04	92.095	115	145.693	8.335	228	185.062	10.387	9483	8627.2	501.227	PF11960,PF00487	PTHR32100,PTHR32100:SF13		1.3.1.35		GO:0055114,GO:0016717,GO:0006629	AT3G12120.2	FAD2	fatty acid desaturase 2
PGSC0003DMG400040260	996	Glucan endo-1,3-beta-glucosidase, basic isoform 1	56	68.68	4.573	206	207.732	13.784	228	194.724	12.632	1	0.048	0.003	1	0.015	0.001	21	18.389	1.23	PF00332	PTHR32227,PTHR32227:SF114		3.2.1.39		GO:0005975,GO:0004553	AT4G16260.1		Glycosyl hydrolase superfamily protein
PGSC0003DMG400041029	1107	Bcl-2-associated athanogene	23	28.502	1.666	126	127.534	7.431	208	177.667	10.148	61	77.281	4.465	456	370.124	20.973	346	314.775	18.47	PF00612,PF02179	PTHR33322,PTHR33322:SF6				GO:0005515,GO:0051087	AT1G12060.1	ATBAG5,BAG5	BCL-2-associated athanogene 5
PGSC0003DMG400042033	1333	Acid phosphatase 1	307	379.196	20.357	864	874.521	44.535	1332	1137.75	59.66	3244	4109.81	192.187	7864	6383.02	294.064	4073	3704.52	175.75	PF03767	PTHR31284,PTHR31284:SF16		3.1.3.2		GO:0003993	AT4G29270.1		HAD superfamily, subfamily IIIB acid phosphatase
PGSC0003DMG400042183	1116	LRX2	1	0.016	0.001	28	27.504	1.587	44	37.349	2.113	14	17.159	0.982	78	63.103	3.542	1	0.412	0.024	PF05678	PTHR33783,PTHR33783:SF2					AT1G32610.2		hydroxyproline-rich glycoprotein family protein
PGSC0003DMG400044149	1362	UDP-glucose:glucosyltransferase	22	26.569	1.212	167	168.109	7.652	271	231.321	10.366	16	20.27	0.917	323	261.852	11.661	449	408.289	18.686	PF00201	PTHR11926,PTHR11926:SF190		2.4.1.128		GO:0016758,GO:0008152	AT4G34131.1	UGT73B3	UDP-glucosyl transferase 73B3
PGSC0003DMG400044152	1437	UDP-glucosyltransferase	94	115.759	4.962	289	292.05	12.489	350	298.378	12.574	67	84.301	3.583	416	337.569	14.143	229	208.328	8.955	PF00201	PTHR11926,PTHR11926:SF409		2.4.1.203	K13495	GO:0016758,GO:0008152	AT2G36770.1		UDP-Glycosyltransferase superfamily protein
PGSC0003DMG400044366	423	Photosystem Q(B) protein	151	187.12	44.378	981	992.945	232.589	554	473.208	102.555	511	647.384	146.627	1983	1609.55	338.59	744	676.857	163.158	PF00124	PTHR33149,PTHR33149:SF4		1.10.3.9	K02703	GO:0045156,GO:0019684,GO:0009772	ATCG00020.1		photosystem II reaction center protein A
PGSC0003DMG400046040	342	Hypothetical protein	226	280.06	104.128	582	589.087	214.824	787	672.229	217.742	172	217.906	75.446	1017	825.475	255.82	1180	1073.51	409.493
PGSC0003DMG400046546	2910	Tir-nbs resistance protein	54	65.926	1.29	232	234.764	4.59	227	193.456	3.757	66	82.874	1.616	513	415.704	8.051	158	143.614	2.814	PF00931	PTHR32472,PTHR32472:SF12				GO:0043531	AT5G56220.1		P-loop containing nucleoside triphosphate hydrolases superfamily protein
PGSC0003DMG401004023	1710	Heat shock factor protein HSF24	67	83.027	2.916	221	223.691	7.84	1141	974.604	33.752	110	139.359	4.86	610	495.123	17.065	2786	2534.58	89.216	PF00447	PTHR10015,PTHR10015:SF166	KOG0627		K09419	GO:0043565,GO:0006355,GO:0005634,GO:0003700	AT4G36990.1	AT-HSFB1,ATHSF4,HSF4,HSFB1	heat shock factor 4
PGSC0003DMG401004193	3221	Zinc knuckle family protein	88	107.811	1.893	297	300.122	5.264	289	246.742	4.302	52	65.261	1.142	126	102.012	1.774	50	44.702	0.786		PTHR31973,PTHR31973:SF18
PGSC0003DMG401007615	2512	Urea active transporter || Sodium:solute symporter family protein || Urea active transporter, solute:sodium symporter	79	96.658	2.568	280	282.398	11.083	481	410.855	15.487	237	298.987	10.694	1857	1506.47	52.456	3703	3367.91	122.225	PF00474	PTHR11819,PTHR11819:SF94				GO:0055085,GO:0016020,GO:0006810,GO:0005215	AT5G45380.1	ATDUR3,DUR3	solute:sodium symporters;urea transmembrane transporters
PGSC0003DMG401011362	2226	Hypothetical protein	8	9.223	1.713	68	68.226	4.618	118	100.694	5.671	24	30.286	0.789	88	70.758	4.262	67	60.413	5.799
PGSC0003DMG401012985	1848	Glycosyltransferase	6	6.196	0.272	132	132.595	5.736	163	139.229	5.107	19	22.804	0.903	311	251.62	10.747	240	217.431	8.14							AT5G03795.1		Exostosin family protein
PGSC0003DMG401017288	1243	Small heat-shock protein	278	344.498	17.769	919	930.19	47.577	1085	926.77	46.396	379	480.154	24.674	1571	1274.33	64.333	521	473.983	24.924	PF00011	PTHR11527,PTHR11527:SF134			K13993		AT1G06460.1	ACD31.2,ACD32.1	alpha-crystallin domain 32.1
PGSC0003DMG401018223	2753	Ferric-chelate reductase	238	293.691	6.289	815	824.924	17.648	1283	1095.89	23.257	175	220.44	4.702	495	401.78	8.507	137	124.637	2.665	PF01794,PF08022,PF08030	PTHR11972	KOG0534	1.16.1.7		GO:0055114,GO:0016491	AT5G49730.1	ATFRO6,FRO6	ferric reduction oxidase 6
PGSC0003DMG401018318	6796	Hypothetical protein	124	153.201	1.276	443	447.81	4.862	489	417.148	4.022	118	149.321	1.711	381	308.693	2.987	252	229.189	2.125	PF08387
PGSC0003DMG401018787	991	TAGL12 transcription factor	74	91.701	6.976	259	261.141	18.268	272	232.333	15.289	63	79.814	5.278	177	143.667	9.292	123	111.899	16.097	PF00319	PTHR11945,PTHR11945:SF152				GO:0046983,GO:0003677	AT1G71692.1	AGL12,XAL1	AGAMOUS-like 12
PGSC0003DMG401019343	2071	DNA binding protein	53	65.678	2.05	173	174.095	5.676	209	178.521	5.846	44	54.477	1.782	262	212.659	6.939	144	131.005	4.283	PF00447	PTHR10015,PTHR10015:SF160			K09419	GO:0043565,GO:0006355,GO:0005634,GO:0003700	AT3G22830.1	AT-HSFA6B,HSFA6B	heat shock transcription factor A6B
PGSC0003DMG401021159	2092	Phospho-n-acetylmuramoyl-pentapeptide-transferase	55	68.156	2.405	175	177.131	6.571	207	176.812	7.434	70	88.683	3.808	231	187.498	6.412	221	200.146	7.903	PF00953	PTHR22926,PTHR22926:SF3		2.7.8.13		GO:0016021,GO:0008963	AT4G18270.1	ATTRANS11,TRANS11	translocase 11
PGSC0003DMG401024842	859	Hypothetical protein	77	95.419	8.242	214	216.606	18.267	3549	3031.44	241.333	277	349.663	27.797	633	513.791	40.037	14055	12786.6	1044.46		PTHR31723,PTHR31723:SF1					AT1G78780.2		pathogenesis-related family protein
PGSC0003DMG401026555	1796	Hypothetical protein	59	71.874	3.305	185	187.252	7.279	228	194.75	8.316	85	106.419	4.13	469	380.676	14.319	511	464.884	16.899	PF13839	PTHR32285,PTHR32285:SF13					AT5G15900.1	TBL19	TRICHOME BIREFRINGENCE-LIKE 19
PGSC0003DMG401029631	4689	Pleiotropic drug resistance protein 1 || ATP-binding cassette transporter	575	712.541	8.419	2096	2121.52	25.051	7807	6668.48	78.423	1267	1605.16	18.921	5808	4714.22	55.35	25043	22783	269.409	PF14510,PF08370,PF00005,PF01061	PTHR19241,PTHR19241:SF221		3.6.3.17		GO:0016887,GO:0005524,GO:0016020	AT1G15520.1	ABCG40,ATABCG40,ATPDR12,PDR12	pleiotropic drug resistance 12
PGSC0003DMG401030736	1654	Zinc finger family protein	302	373	23.324	972	983.835	59.584	950	810.604	49.79	176	221.706	13.795	1384	1122.55	69.094	529	481.26	29.994	PF13639	PTHR22763,PTHR22763:SF49				GO:0008270,GO:0005515	AT2G15580.1		RING/U-box superfamily protein
PGSC0003DMG402000056	3055	Bypass1	2644	3276.45	95.297	8044	8140.94	233.596	8652	7389.4	212.428	2124	2689.62	78.413	8391	6810.78	197.937	5984	5443.06	159.038	PF03087	PTHR31509,PTHR31509:SF3					AT2G46080.1
PGSC0003DMG402003286	3094	ACI112	23	28.502	0.909	135	136.644	4.138	123	105.062	3.206	34	43.074	1.695	286	231.328	6.93	84	75.51	2.436
PGSC0003DMG402003745	1511	Nicotiana tabacum wound inducive mRNA , complete cds	6748	8362.14	338.188	22708	22984.5	927.584	23483	20058.4	798.376	7001	8869.54	355.85	28829	23399.8	926.231	10003	9100.28	369.056	PF02577	PTHR15160,PTHR15160:SF3				GO:0004518	AT1G19660.2		Wound-responsive family protein
PGSC0003DMG402004423	4663	Cc-nbs-lrr resistance protein	95	117.724	1.41	334	337.055	4.017	455	388.645	4.615	145	182.433	2.172	434	352.268	4.165	563	511.282	6.094		PTHR23155,PTHR23155:SF606	KOG1947				AT3G14460.1		LRR and NB-ARC domains-containing disease resistance protein
PGSC0003DMG402004862	1363	Hypothetical protein	11	13.631	0.621	58	58.706	2.67	97	82.854	3.71	13	16.47	0.744	46	37.337	1.661	67	60.954	2.787
PGSC0003DMG402005679	1752	Cytochrome P450	77	95.419	3.402	346	349.2	13.231	423	361.313	14.482	3	3.801	0.133	104	84.414	3.417	36	32.751	1.332	PF00067	PTHR24298,PTHR24298:SF178	KOG0156	1.14.13.121		GO:0055114,GO:0020037,GO:0016705,GO:0005506	AT3G26320.1	CYP71B36	cytochrome P450, family 71, subfamily B, polypeptide 36
PGSC0003DMG402005796	713	Brain protein 44	100	123.92	12.797	341	345.152	35.452	366	312.625	31.011	166	210.305	21.282	672	545.447	53.368	638	580.423	60.365	PF03650	PTHR14154,PTHR14154:SF16	KOG1590			GO:0006850,GO:0005743	AT5G20090.1		Uncharacterised protein family (UPF0041)
PGSC0003DMG402005859	1319	Hypothetical protein	1149	1422.6	94.748	3120	3156.97	209.698	3596	3071.58	199.41	1193	1511.41	99.46	4435	3598.97	231.712	1742	1583.88	106.095		PTHR33591,PTHR33591:SF1		5.2.1.14			AT1G64680.1
PGSC0003DMG402006809	942	Hypothetical protein	65	79.311	5.665	271	273.29	19.448	278	237.458	16.493	34	43.075	3.034	118	95.778	6.588	52	47.307	3.396
PGSC0003DMG402014350	1195	Hexose carrier protein HEX6	0	0	0	27	27.329	1.452	30	25.625	1.337	1	1.267	0.067	8	6.493	0.336	4	3.639	0.195
PGSC0003DMG402019696	551	Hypothetical protein	63	78.07	11.776	275	278.348	41.656	232	198.167	28.2	109	138.092	20.224	559	453.727	63.311	149	135.553	20.659	PF12023	PTHR33193,PTHR33193:SF7					AT4G09890.1		Protein of unknown function (DUF3511)
PGSC0003DMG402025083	1344	Peroxidase	1438	1781.97	82.582	4121	4171.18	192.835	5149	4398.1	200.133	1124	1423.99	65.39	6565	5328.66	240.948	3465	3152.3	146.549	PF00141	PTHR31235,PTHR31235:SF12		1.11.1.7	K00430	GO:0055114,GO:0020037,GO:0006979,GO:0004601	AT1G71695.1		Peroxidase superfamily protein
PGSC0003DMG402026984	2415	BTB and TAZ domain protein 2 || BTB/POZ domain-containing protein	100	123.92	5.001	486	490.905	20.24	729	622.687	25.249	122	153.294	5.955	851	690.737	27.133	1117	1015.29	40.292	PF02135	PTHR24413,PTHR24413:SF75		2.3.1.48		GO:0008270,GO:0006355,GO:0005634,GO:0004402,GO:0003712	AT5G63160.1	BT1	BTB and TAZ domain protein 1
PGSC0003DMG402028595	2078	Kinase family protein	2	2.478	0.07	47	47.572	1.341	57	48.688	1.36	3	3.801	0.107	29	23.539	0.655	11	10.007	0.283		PTHR27001,PTHR27001:SF188		2.7.11.1			AT3G05140.1	RBK2	ROP binding protein kinases 2
PGSC0003DMG403030532	2073	Wall-associated kinase	68	84.266	2.489	300	303.653	8.957	279	237.459	6.927	189	238.178	6.995	726	588.466	17.089	545	494.906	14.636	PF00069	PTHR27005,PTHR27005:SF35	KOG0192	2.7.11.1		GO:0006468,GO:0005524,GO:0004672	AT1G25390.1		Protein kinase superfamily protein
